# Supplementary material for: Discovery and fine-mapping of adiposity loci using high density imputation of genome-wide association studies in individuals of African ancestry: African Ancestry Anthropometry Genetics Consortium
Source: PubMed Central journal article supplement (PMC5419579; doi:10.1371/journal.pgen.1006719), 2017-04-21
Supplement: pgen.1006719.s003.pdf [file pgen.1006719.s003.pdf]

**BMI, Women only**

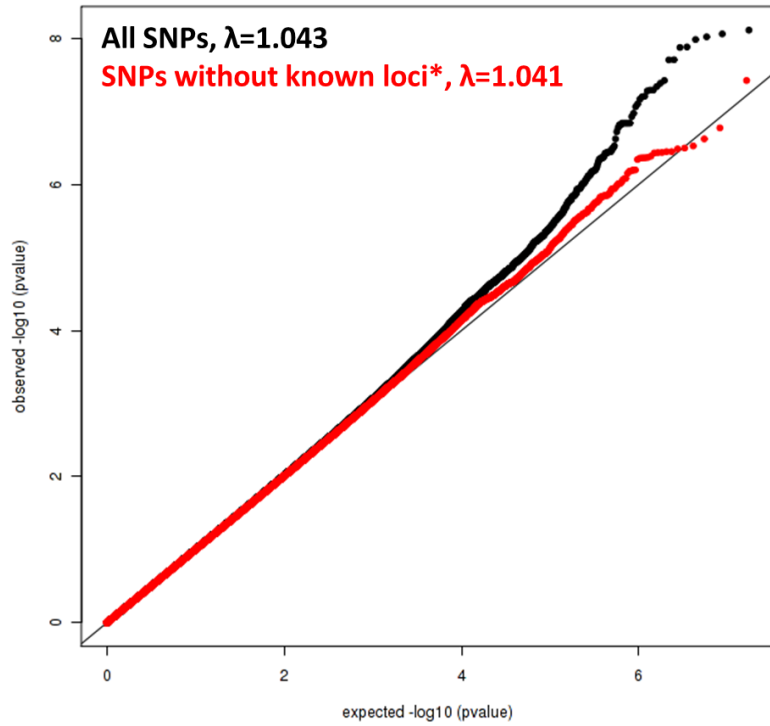

**BMI, Men only**

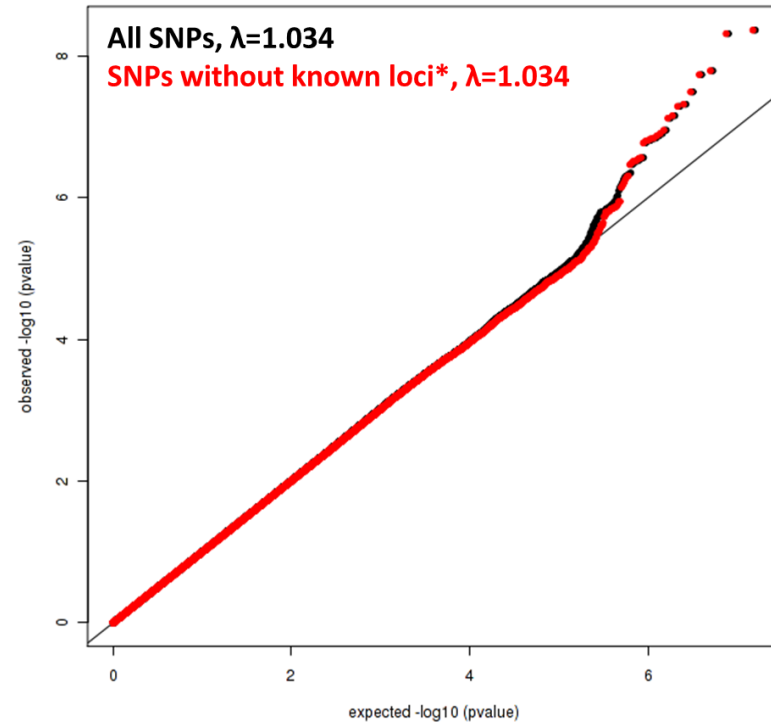

\*Known loci removed are defined by +/- 500kb around all lead SNPs reported in the literature.
