# Supplementary material for: Discovery and fine-mapping of adiposity loci using high density imputation of genome-wide association studies in individuals of African ancestry: African Ancestry Anthropometry Genetics Consortium
Source: PubMed Central journal article supplement (PMC5419579; doi:10.1371/journal.pgen.1006719), 2017-04-21
Supplement: pgen.1006719.s007.pdf [file pgen.1006719.s007.pdf]

## WHRadjBMI, Men and Women Combined

Known loci

Novel SNPs, Pvalue<5e-08

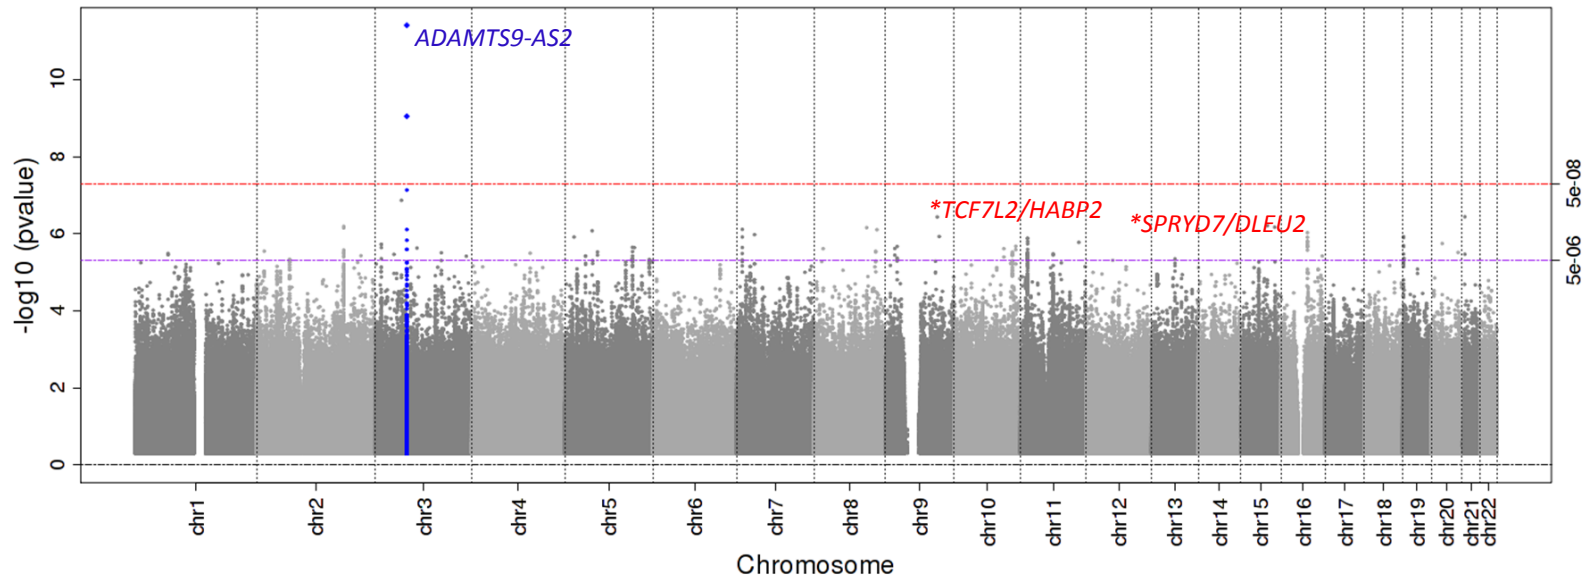

\**TCF7L2/HABP2* (chromosome 10, position 115,189,239) and \**SPRYD7/DLEU2* (chromosome 13, position 50,536,360) were genome-wide significant after combining discovery with replication results.
