# Supplementary material for: Discovery and fine-mapping of adiposity loci using high density imputation of genome-wide association studies in individuals of African ancestry: African Ancestry Anthropometry Genetics Consortium
Source: PubMed Central journal article supplement (PMC5419579; doi:10.1371/journal.pgen.1006719), 2017-04-21
Supplement: pgen.1006719.s008.pdf [file pgen.1006719.s008.pdf]

## BMI, Women only (top) and Men only (bottom)

Known loci

Novel SNPs, Pvalue<5e-08

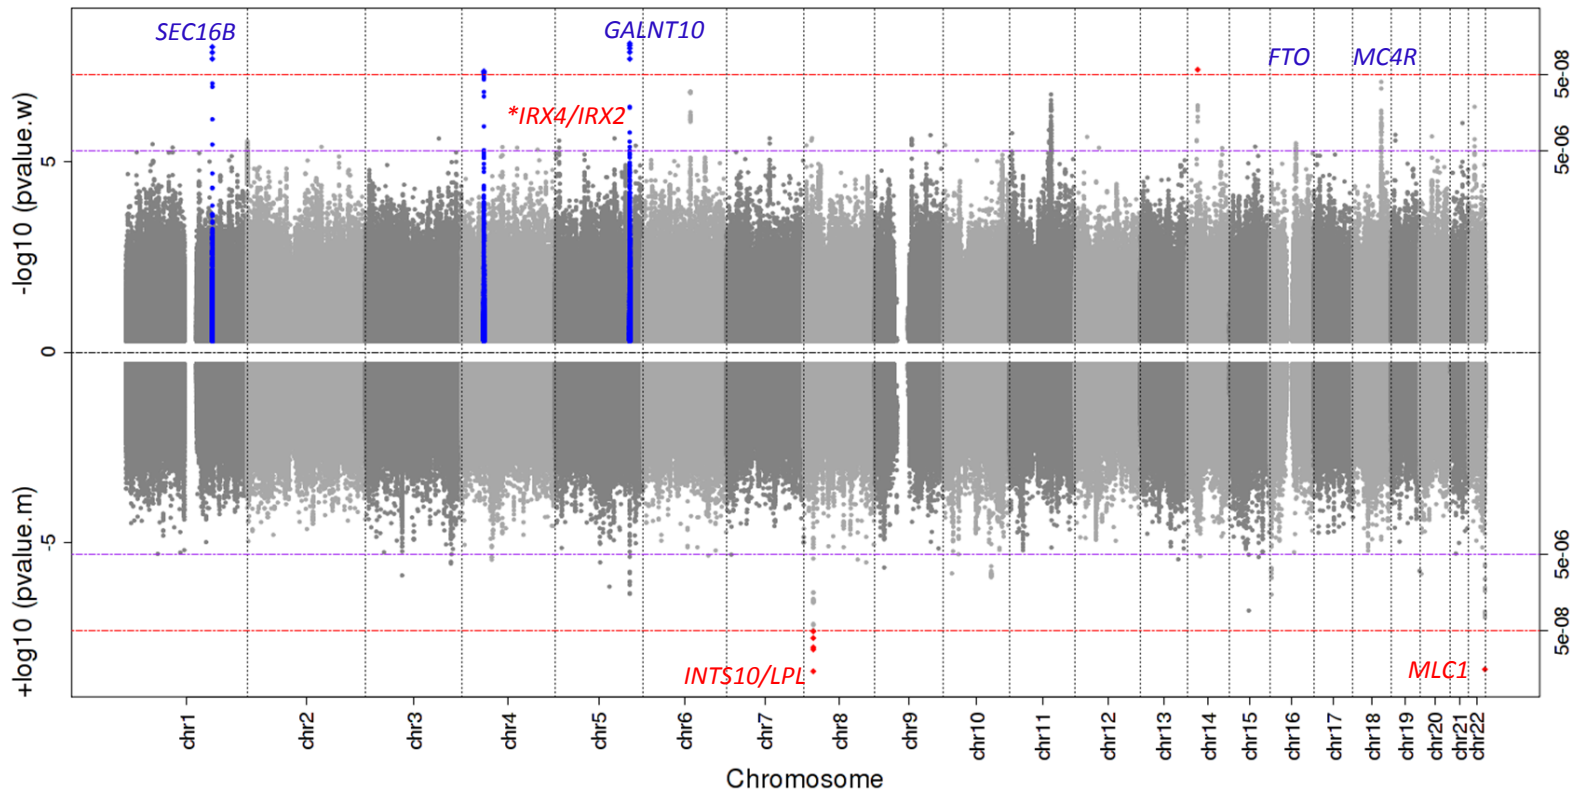

\* *IRX4/IRX2* (chromosome 5, position 2,177,693), *FTO* (chromosome 16, position 53,828,066), and *MC4R* (chromosome 18, position 57,829,135) were genome-wide significant after combining discovery with replication results.
