# Supplementary material for: Discovery and fine-mapping of adiposity loci using high density imputation of genome-wide association studies in individuals of African ancestry: African Ancestry Anthropometry Genetics Consortium
Source: PubMed Central journal article supplement (PMC5419579; doi:10.1371/journal.pgen.1006719), 2017-04-21

(A)

### rs543874 BMI Men & Women: AFR-LD

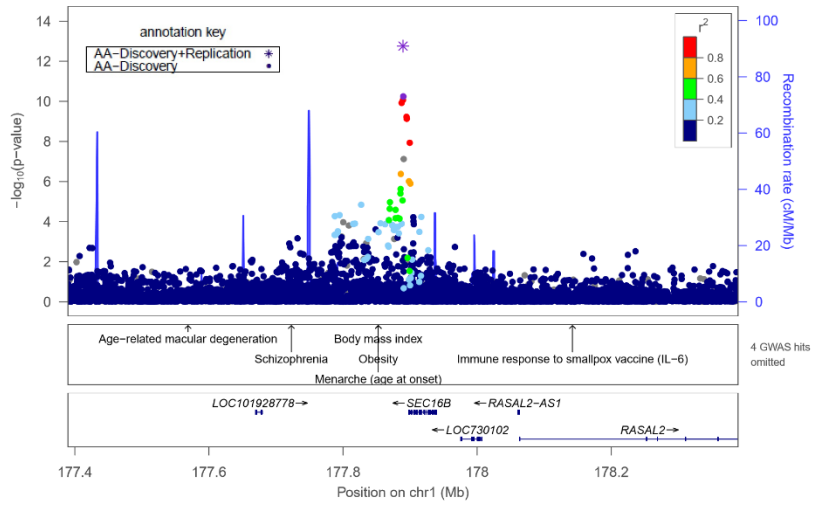

### rs62105306 BMI Men & Women: AFR-LD

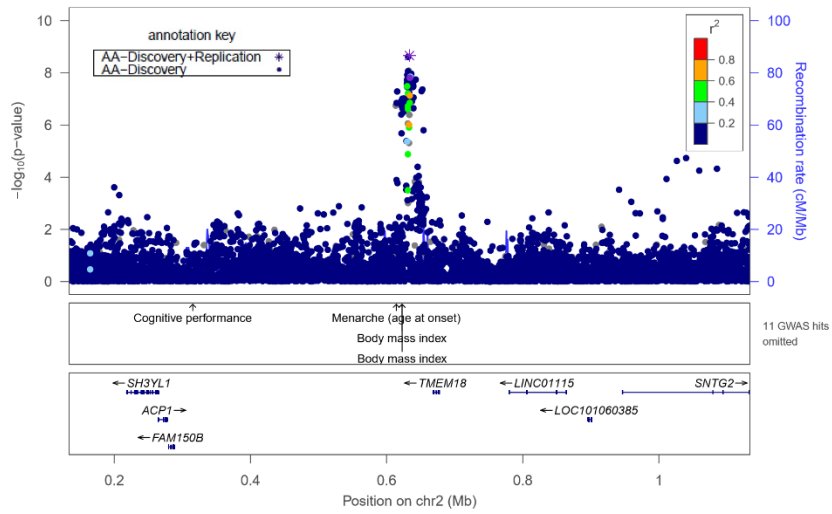

### rs10938397 BMI Men & Women: AFR-LD

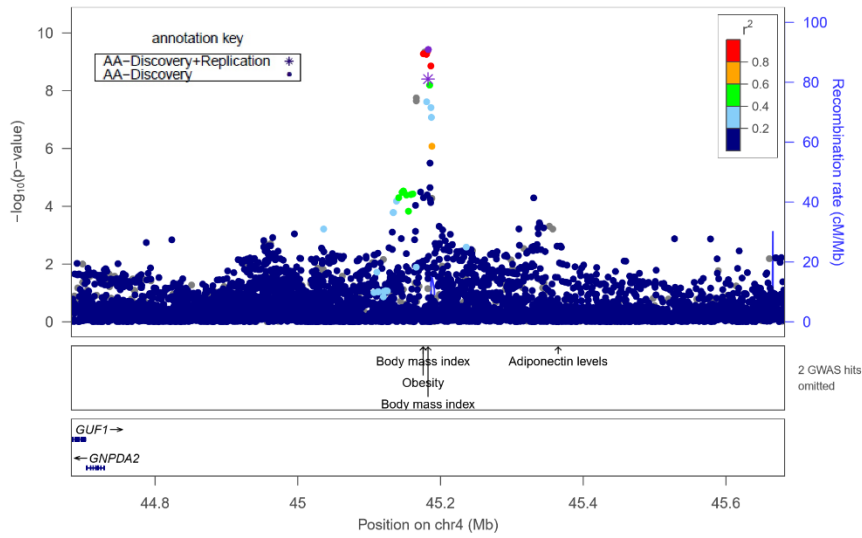

### rs7708584 BMI Men & Women: AFR-LD

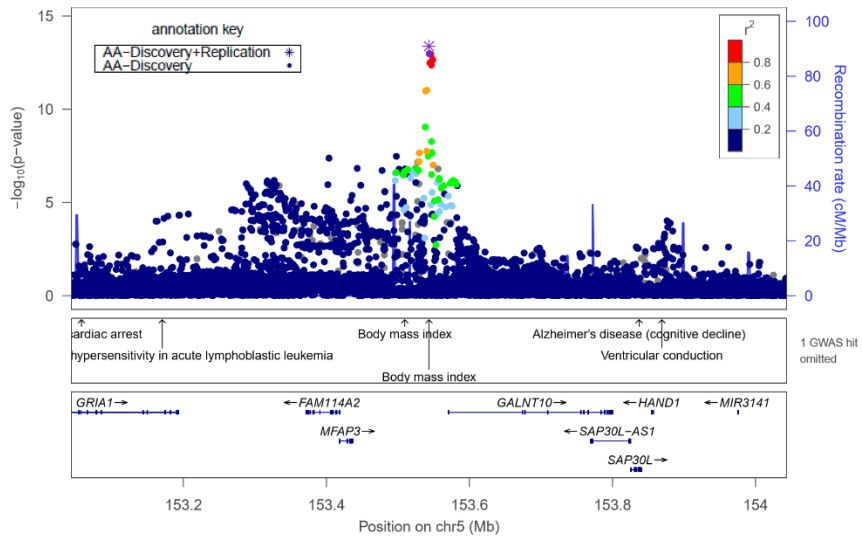

### rs17057164 BMI Men & Women: AFR-LD

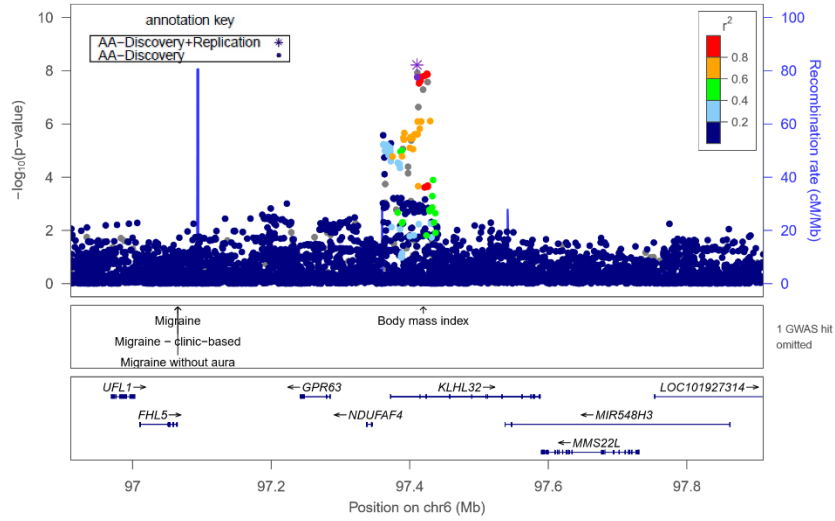

### rs17817964 BMI Men & Women: AFR-LD

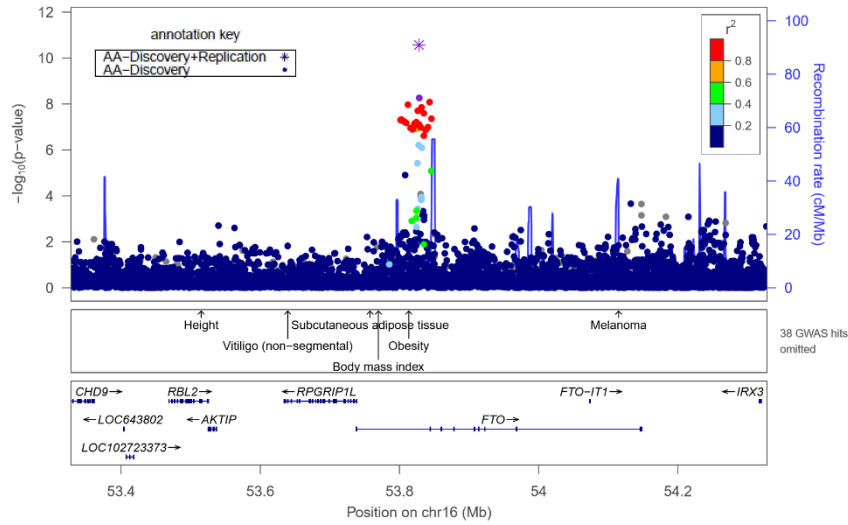

rs6567160 BMI Men & Women: AFR-LD

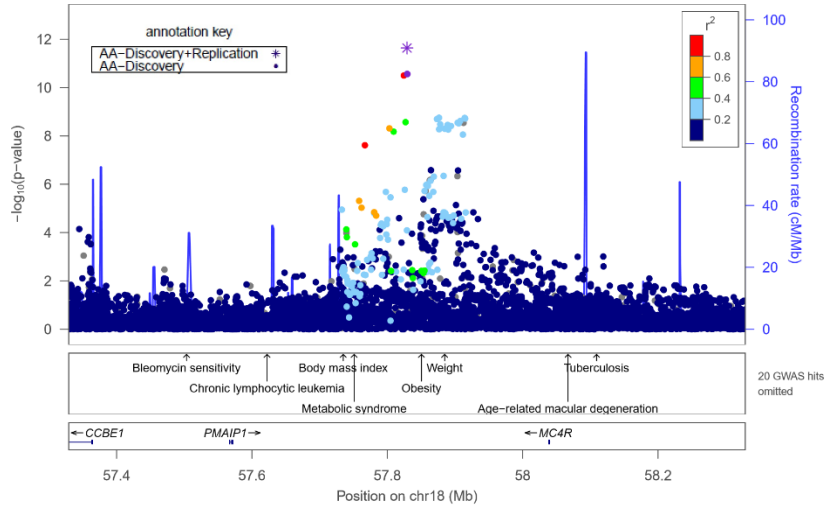

(B)

rs66815886 WHRadjBMI Men & Women: AFR-LD

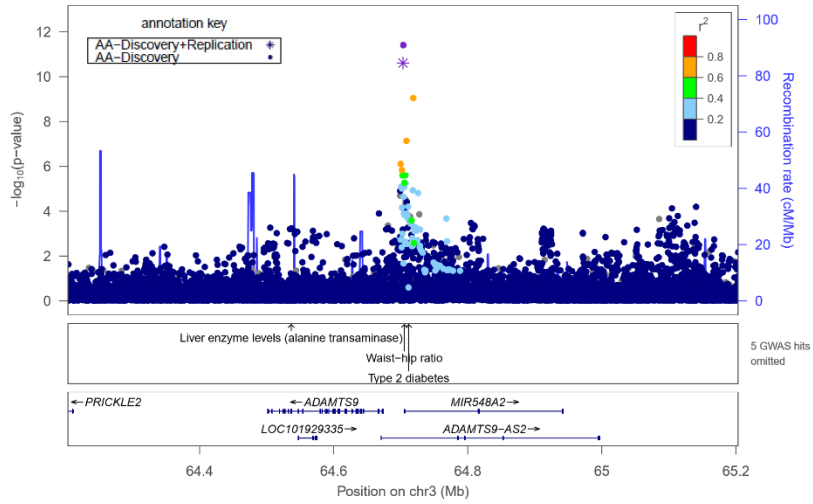

Supplement: pgen.1006719.s010.pdf [file pgen.1006719.s010.pdf]
