# Supplementary material for: Discovery and fine-mapping of adiposity loci using high density imputation of genome-wide association studies in individuals of African ancestry: African Ancestry Anthropometry Genetics Consortium
Source: PubMed Central journal article supplement (PMC5419579; doi:10.1371/journal.pgen.1006719), 2017-04-21

**(A)** Effect size for BMI associated SNPs

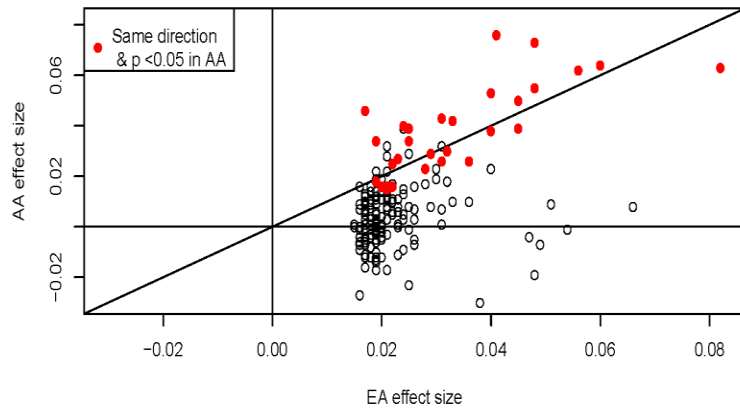

**(B)** Effect size for WHR associated SNPs

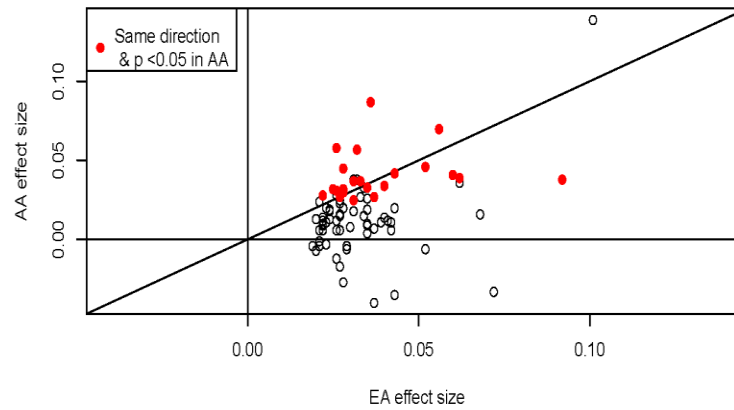

**(C)** Effect Allele Frequency for BMI associated SNPs

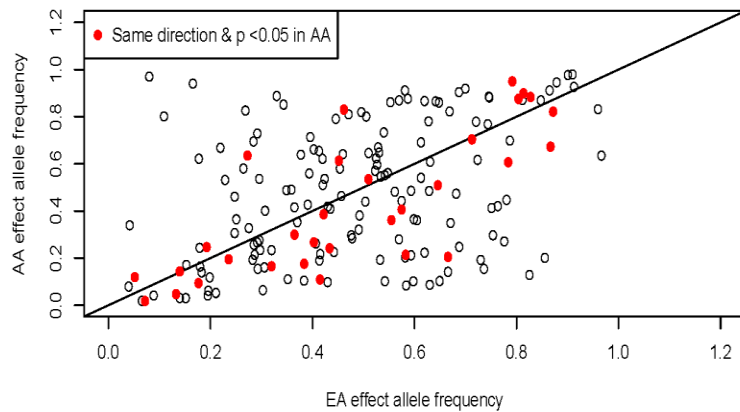

**(D)** Effect Allele Frequency for WHR associated SNPs

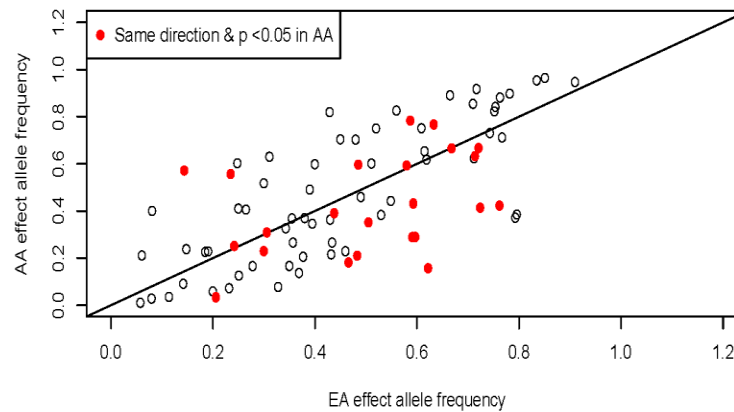

Supplement: pgen.1006719.s011.pdf [file pgen.1006719.s011.pdf]
