# Supplementary material for: Discovery and fine-mapping of adiposity loci using high density imputation of genome-wide association studies in individuals of African ancestry: African Ancestry Anthropometry Genetics Consortium
Source: PLoS Genet. 2017 Apr 21;13(4):e1006719. doi: 10.1371/journal.pgen.1006719 (PMC5419579; doi:10.1371/journal.pgen.1006719)
Supplement: S5 Table — (XLSX) [file pgen.1006719.s016.xlsx]

## Sheet: S5 Table
S5 Table. Comparison of lead variants between 1000 Genomes and HapMap imputed meta-analysis in AA in previously identified BMI loci in discovery and replication studies
	1000 Genomes									HapMap
Reported Loci	Lead SNP	Chr	Position (b37/hg19)	Present in HapMap?	Effect/Other alleles	EAF	Effect (SE)	P	N	Lead SNP	Chr	Position (b37/hg19)	Effect/Other alleles	EAF	Effect (SE)	P	N	LD (r2 with 1KGP SNP in 1KGP AFR)
SEC16B	rs543874	1	177889480	Y	G/A	0.249706	0.055 (0.008)	1.762e-13	52824	rs543874	1	177889480	G/A	0.25	0.060 (0.008)	2e-13	45704	1
ADCY3	rs10203482	2	25136916	N	C/T	0.8137	0.044 (0.009)	3.354e-07	52893	rs7586879	2	25116977	T/C	0.77	0.047 (0.009)	3.6e-08	45765	0.5179
GNPDA2	rs10938397	4	45182527	Y	G/A	0.242925	0.044 (0.008)	3.945e-09	52895	rs348495	4	45184442	G/A	0.34	0.051 (0.008)	1.6e-10	45914	0.5709
GALNT10	rs7708584	5	153543466	Y	A/G	0.304721	0.054 (0.007)	4.206e-14	52893	rs7708584	5	153543466	A/G	0.32	0.04 (0.006)	1.448e-10	70373	1
KLHL32	rs17057164	6	97410536	Y	T/C	0.656665	0.04 (0.007)	6.078e-09	52894	rs974417	6	97419598	C/T	0.66	0.031 (0.006)	3.285e-08	71387	0.9968
MIR148A/NFE2L3	rs144575675	7	25859678	N	G/A	0.8884	0.044 (0.011)	3.296e-05	51881	rs10261878	7	25950545	C/A	0.44	0.028 (0.006)	5.876e-07	71226	0.0141
FTO	rs17817964	16	53828066	Y	T/C	0.113719	0.069 (0.01)	2.717e-11	52893	rs17817964	16	53828066	T/C	0.12	0.073 (0.011)	1.05e-10	45849	1
MC4R	rs6567160	18	57829135	Y	C/T	0.196842	0.059 (0.008)	2.286e-12	52893	rs6567160	18	57829135	C/T	0.21	0.059 (0.009)	2.96e-11	45920	1
From HapMap derived lead SNPs +/- 500kb, the most significant regional SNPs in the 1000 Genome results were presented.
