# Supplementary material for: Discovery and fine-mapping of adiposity loci using high density imputation of genome-wide association studies in individuals of African ancestry: African Ancestry Anthropometry Genetics Consortium
Source: PLoS Genet. 2017 Apr 21;13(4):e1006719. doi: 10.1371/journal.pgen.1006719 (PMC5419579; doi:10.1371/journal.pgen.1006719)
Supplement: S9 Table — This table lists all previously-reported associations within 1 Mb (+/- 500 kb) and in high LD (r2 >0.7) with our lead novel SNPs along with relevant annotation (e.g. miRNA target binding site, variant location relevant to nearest gene, gene function prediction) reported in the GRASP Catalog. (XLSX) [file pgen.1006719.s020.xlsx]

## Sheet: S9 Table
S9 Table. Previously-reported associations of novel BMI and WHRadjBMI loci with other traits in the GRASP Catalog. This table lists all previously-reported associations within 1 MB (+/- 500 kb) and in high LD (r2 >0.7) with our lead novel SNPs along with relevant annotation (e.g. miRNA target binding site, variant location relevant to nearest gene, gene function prediction) reported in the GRASP …
Trait	Discovery Sample (AAAGC)	Chr	SNP (AAAGC)	Position (b37/hg19) (AAAGC)	SNP (GRASP)	Position (b37/hg19) (GRASP)	r2 (AAAGC vs. GRASP)	PMID (GRASP)	P (GRASP)	Disease/Trait	Disease/Trait Detail	Ancestry	Total N (GRASP)	Gene	miRNA	SNP Function	POLYPHEN2 Score	SIFT	UNIPROT	Non-GWAS Study
WHRadjBMI	Women	8	rs378854	128323819	rs13256367	128334900	0.956422	20081858	0.02204	Fasting blood glucose	Glucose homeostasis traits (fasting glucose, fasting insulin, HOMA-B, HOMA-IR)	European	168930
WHRadjBMI	Women	8	rs378854	128323819	rs13256367	128334900	0.956422	21355061	0.02	Urinary albumin-to-creatinine ratio	Albuminuria, in urine	European	94437
WHRadjBMI	Women	8	rs378854	128323819	rs13256367	128334900	0.956422	20935629	0.0034	Waist hip ratio	Waist:hip ratio	European	267970
WHRadjBMI	Women	8	rs378854	128323819	rs13256367	128334900	0.956422	20081858	0.02547	HOMA-IR	Glucose homeostasis traits (fasting glucose, fasting insulin, HOMA-B, HOMA-IR)	European	168930
WHRadjBMI	MenAndWomen	13	rs2472591	50536360	rs11617754	50501980	0.894524	20189245	0.0079	Childhood acute lymphoblastic leukemia	Leukemia (childhood acute lymphoblastic leukemia)	Asian	93	SPRYD7		Intron
WHRadjBMI	MenAndWomen	13	rs2472591	50536360	rs11617754	50501980	0.894524	20935629	0.00011	Waist hip ratio	Waist:hip ratio	European	190803	SPRYD7		Intron
WHRadjBMI	MenAndWomen	13	rs2472591	50536360	rs2475837	50535863	0.927085	20935629	2.22e-05	Waist hip ratio	Waist:hip ratio	European	190803
WHRadjBMI	MenAndWomen	13	rs2472591	50536360	rs2475837	50535863	0.927085	19197363	0.02475	Schizophrenia	Schizophrenia	European	16189
WHRadjBMI	MenAndWomen	13	rs2472591	50536360	rs790943	50637787	0.853103	22233810	0.0043284	Gene expression of TRIM13 (ENSG00000204977) in dendritic cells treated with Mycobacterium tuberculosis	Gene expression in blood dendritic cells before and after exposure to Mycobacterium tuberculosis	European	65	DLEU2		Intron				eQTL
WHRadjBMI	MenAndWomen	13	rs2472591	50536360	rs790943	50637787	0.853103	22233810	0.0107932	Gene expression change of TRIM13 (ENSG00000204977) in dendritic cells after treatment with Mycobacterium tuberculosis	Gene expression in blood dendritic cells before and after exposure to Mycobacterium tuberculosis	European	65	DLEU2		Intron				eQTL
WHRadjBMI	MenAndWomen	13	rs2472591	50536360	rs790943	50637787	0.853103	20935629	0.00039	Waist hip ratio	Waist:hip ratio	European	190803	DLEU2		Intron
WHRadjBMI	MenAndWomen	13	rs2472591	50536360	rs790943	50637787	0.853103	22132133	0.00613	PROP taste detection threshold	Taste perception	Hispanic	225	DLEU2		Intron
WHRadjBMI	MenAndWomen	13	rs2472591	50536360	rs2066571 a	50646218	0.866149	20935629	0.00039	Waist hip ratio	Waist:hip ratio	European	190803	DLEU2		Intron
WHRadjBMI	Women	16	rs6499129	67458251	rs1471143	67386349	0.780103	20383146	0.043	Chronic kidney disease	Chronic kidney disease (CKD) and renal traits	European	157168	LRRC36		Intron
WHRadjBMI	Women	16	rs6499129	67458251	rs1862689	67419152	0.764805	20081856	0.00207	Major depressive disorder	Major mood disorder	European	36185
WHRadjBMI	Women	16	rs6499129	67458251	rs1053612	67423939	0.780103	20686565	4.93e-05	HDL cholesterol	Lipid level measurements	Mixed	240243	TPPP3		3'UTR
WHRadjBMI	Women	16	rs6499129	67458251	rs897901	67425198	0.780103	20935629	0.036	Waist hip ratio	Waist:hip ratio	European	267970	TPPP3		Intron
WHRadjBMI	Women	16	rs6499129	67458251	rs1471143	67386349	0.780103	20502693	2.54e-06	Gene expression of ATP6V0D1 in peripheral blood monocytes	Gene expression in monocytes	European	3852	LRRC36		Intron				eQTL
WHRadjBMI	Women	16	rs6499129	67458251	rs1471143	67386349	0.780103	20686565	1.59e-05	HDL cholesterol	Lipid level measurements	Mixed	240243	LRRC36		Intron
WHRadjBMI	Women	16	rs6499129	67458251	rs1471143	67386349	0.780103	20881960	0.002843	Height	Height	European	317380	LRRC36		Intron
WHRadjBMI	Women	16	rs6499129	67458251	rs1471143	67386349	0.780103	22182935	0.016	Bipolar disorder	Bipolar disorder	Mixed	33353	LRRC36		Intron
WHRadjBMI	Women	16	rs6499129	67458251	rs1471143	67386349	0.780103	20935629	0.043	Waist hip ratio	Waist:hip ratio	European	267970	LRRC36		Intron
WHRadjBMI	Women	16	rs6499129	67458251	rs1471143	67386349	0.780103	20502693	3.2e-06	Gene expression of ZDHHC1 in peripheral blood monocytes	Gene expression in monocytes	European	3852	LRRC36		Intron				eQTL
WHRadjBMI	Women	16	rs6499129	67458251	rs1471143	67386349	0.780103	20081858	0.009991	Fasting blood glucose	Glucose homeostasis traits (fasting glucose, fasting insulin, HOMA-B, HOMA-IR)	European	168930	LRRC36		Intron
WHRadjBMI	Women	16	rs6499129	67458251	rs1471143	67386349	0.780103	20502693	4.62e-33	Gene expression of DUS2L in peripheral blood monocytes	Gene expression in monocytes	European	3852	LRRC36		Intron				eQTL
WHRadjBMI	Women	16	rs6499129	67458251	rs1471143	67386349	0.780103	20502693	3.06e-10	Gene expression of AGRP in peripheral blood monocytes	Gene expression in monocytes	European	3852	LRRC36		Intron				eQTL
WHRadjBMI	Women	16	rs6499129	67458251	rs1471143	67386349	0.780103	20383146	0.034	Cystatin C in serum	Chronic kidney disease (CKD) and renal traits	European	157168	LRRC36		Intron
WHRadjBMI	Women	16	rs6499129	67458251	rs1471143	67386349	0.780103	20502693	1.51e-08	Gene expression of GFOD2 in peripheral blood monocytes	Gene expression in monocytes	European	3852	LRRC36		Intron				eQTL
WHRadjBMI	Women	16	rs6499129	67458251	rs1471143	67386349	0.780103	20502693	5.7e-13	Gene expression of TRADD in peripheral blood monocytes	Gene expression in monocytes	European	3852	LRRC36		Intron				eQTL
WHRadjBMI	Women	16	rs6499129	67458251	rs1862689	67419152	0.764805	20502693	2.38e-06	Gene expression of ATP6V0D1 in peripheral blood monocytes	Gene expression in monocytes	European	3852							eQTL
WHRadjBMI	Women	16	rs6499129	67458251	rs1862689	67419152	0.764805	20686565	7.17e-07	HDL cholesterol	Lipid level measurements	Mixed	240243
WHRadjBMI	Women	16	rs6499129	67458251	rs1862689	67419152	0.764805	20502693	8.41e-06	Gene expression of ELMO3 in peripheral blood monocytes	Gene expression in monocytes	European	3852							eQTL
WHRadjBMI	Women	16	rs6499129	67458251	rs1862689	67419152	0.764805	20502693	6.46e-08	Gene expression of TRADD in peripheral blood monocytes	Gene expression in monocytes	European	3852							eQTL
WHRadjBMI	Women	16	rs6499129	67458251	rs1862689	67419152	0.764805	20081858	0.01873	Fasting blood glucose	Glucose homeostasis traits (fasting glucose, fasting insulin, HOMA-B, HOMA-IR)	European	168930
WHRadjBMI	Women	16	rs6499129	67458251	rs1862689	67419152	0.764805	20502693	1.22e-06	Gene expression of RPL36A in peripheral blood monocytes	Gene expression in monocytes	European	3852							eQTL
WHRadjBMI	Women	16	rs6499129	67458251	rs1862689	67419152	0.764805	20502693	0	Gene expression of DUS2L in peripheral blood monocytes	Gene expression in monocytes	European	3852							eQTL
WHRadjBMI	Women	16	rs6499129	67458251	rs1862689	67419152	0.764805	20502693	8.18e-10	Gene expression of GFOD2 in peripheral blood monocytes	Gene expression in monocytes	European	3852							eQTL
WHRadjBMI	Women	16	rs6499129	67458251	rs1862689	67419152	0.764805	20502693	2.94e-06	Gene expression of LRRC29 in peripheral blood monocytes	Gene expression in monocytes	European	3852							eQTL
WHRadjBMI	Women	16	rs6499129	67458251	rs1862689	67419152	0.764805	18587394	0.0328181	Irritible bowel syndrome	Crohn's disease	European	24269
WHRadjBMI	Women	16	rs6499129	67458251	rs1862689	67419152	0.764805	20502693	2.11e-06	Gene expression of PARD6A in peripheral blood monocytes	Gene expression in monocytes	European	3852							eQTL
WHRadjBMI	Women	16	rs6499129	67458251	rs1862689	67419152	0.764805	20383146	0.047	Chronic kidney disease	Chronic kidney disease (CKD) and renal traits	European	157168
WHRadjBMI	Women	16	rs6499129	67458251	rs1053612	67423939	0.780103	20383146	0.05	Chronic kidney disease	Chronic kidney disease (CKD) and renal traits	European	157168	TPPP3		3'UTR
WHRadjBMI	Women	16	rs6499129	67458251	rs1053612	67423939	0.780103	20383146	0.027	Cystatin C in serum	Chronic kidney disease (CKD) and renal traits	European	157168	TPPP3		3'UTR
WHRadjBMI	Women	16	rs6499129	67458251	rs1053612	67423939	0.780103	20081858	0.01038	Fasting blood glucose	Glucose homeostasis traits (fasting glucose, fasting insulin, HOMA-B, HOMA-IR)	European	168930	TPPP3		3'UTR
WHRadjBMI	Women	16	rs6499129	67458251	rs1053612	67423939	0.780103	20881960	0.002918	Height	Height	European	317380	TPPP3		3'UTR
WHRadjBMI	Women	16	rs6499129	67458251	rs1053612	67423939	0.780103	20935629	0.038	Waist hip ratio	Waist:hip ratio	European	267970	TPPP3		3'UTR
WHRadjBMI	Women	16	rs6499129	67458251	rs897901	67425198	0.780103	20081858	0.01054	Fasting blood glucose	Glucose homeostasis traits (fasting glucose, fasting insulin, HOMA-B, HOMA-IR)	European	168930	TPPP3		Intron
WHRadjBMI	Women	16	rs6499129	67458251	rs897901	67425198	0.780103	20383146	0.028	Cystatin C in serum	Chronic kidney disease (CKD) and renal traits	European	157168	TPPP3		Intron
WHRadjBMI	Women	16	rs6499129	67458251	rs897901	67425198	0.780103	20881960	0.003032	Height	Height	European	317380	TPPP3		Intron
WHRadjBMI	Women	16	rs6499129	67458251	rs897901	67425198	0.780103	20686565	0.0002112	HDL cholesterol	Lipid level measurements	Mixed	240243	TPPP3		Intron
WHRadjBMI	Women	16	rs6499129	67458251	rs8044843	67318242	0.748077	20081858	0.01979	Fasting blood glucose	Glucose homeostasis traits (fasting glucose, fasting insulin, HOMA-B, HOMA-IR)	European	168930	PLEKHG4	(rs8044843(miR-145);(AB197664);(derived allele creates new site);GUWobble)	Missense	Q58EX7:D525G;A>G;benign;0;1;1	D525G:(D>G);(0.57>0.84);(TOLERATED>TOLERATED)	(PKHG4;VARIANT;525-525;D -> G (in dbSNP:rs8044843). /FTId=VAR_050510.)
WHRadjBMI	Women	16	rs6499129	67458251	rs9928183	67392891	0.780103	20686565	0.004151	HDL cholesterol	Lipid level measurements	Mixed	240243	LRRC36		Intron
WHRadjBMI	Women	16	rs6499129	67458251	rs9921926	67394411	0.780103	20383146	0.033	Chronic kidney disease	Chronic kidney disease (CKD) and renal traits	European	157168	LRRC36		Intron
WHRadjBMI	Women	16	rs6499129	67458251	rs8052852	67394890	0.780103	20935629	0.0059	Waist hip ratio	Waist:hip ratio	European	267970	LRRC36		Intron
WHRadjBMI	Women	16	rs6499129	67458251	rs8047080	67402588	0.780103	18535201	0.0471378	Stabilized warfarin dose	Warfarin dose	European	736	LRRC36		Intron
WHRadjBMI	Women	16	rs6499129	67458251	rs7205526	67410583	0.780103	20383146	0.0064	Serum creatinine	Chronic kidney disease (CKD) and renal traits	European	157168	LRRC36		Intron
WHRadjBMI	Women	16	rs6499129	67458251	rs9934827	67413003	0.780103	20686565	3.31e-06	HDL cholesterol	Lipid level measurements	Mixed	240243	LRRC36		Intron
WHRadjBMI	Women	16	rs6499129	67458251	rs8059722	67440389	0.79651	20881960	0.002711	Height	Height	European	317380	ZDHHC1		Intron
WHRadjBMI	Women	16	rs6499129	67458251	rs8047159	67453634	0.750025	20383146	0.049	Chronic kidney disease	Chronic kidney disease (CKD) and renal traits	European	157168
WHRadjBMI	Women	16	rs6499129	67458251	rs9936153	67455516	0.817985	20686565	0.03541	HDL cholesterol	Lipid level measurements	Mixed	240243
WHRadjBMI	Women	16	rs6499129	67458251	rs9936306	67455559	0.724145	20383146	0.035	Chronic kidney disease	Chronic kidney disease (CKD) and renal traits	European	157168
WHRadjBMI	Women	16	rs6499129	67458251	rs6499129	67458251	1	20686565	0.02188	HDL cholesterol	Lipid level measurements	Mixed	240243
WHRadjBMI	Women	16	rs6499129	67458251	rs8056260	67476572	0.762431	20383146	0.027	Chronic kidney disease	Chronic kidney disease (CKD) and renal traits	European	157168	ATP6V0D1		Intron
WHRadjBMI	Women	16	rs6499129	67458251	rs9922476	67478924	0.768981	20935630	0.0485	Body mass index (BMI)	Body mass index (BMI)	European	373661	ATP6V0D1		Intron
WHRadjBMI	Women	16	rs6499129	67458251	rs9922624	67478976	0.741395	21829388	2.6e-32	Gene expression of HSD11B2///ATP6V0D1 in blood	Gene expression in blood cells	European	4724	ATP6V0D1		Intron				eQTL
WHRadjBMI	Women	16	rs6499129	67458251	rs8063771	67506115	0.746289	20663923	0.000986	Autism without verbal ability	Autism	Mixed	7786	ATP6V0D1		Intron
WHRadjBMI	Women	16	rs6499129	67458251	rs3893749	67533298	0.721157	20881960	0.003435	Height	Height	European	317380
WHRadjBMI	Women	16	rs6499129	67458251	rs4380048	67538193	0.730227	20881960	0.002916	Height	Height	European	317380
WHRadjBMI	Women	16	rs6499129	67458251	rs9933102	67538910	0.730227	20502693	3.62e-08	Gene expression of GFOD2 in peripheral blood monocytes	Gene expression in monocytes	European	3852							eQTL
WHRadjBMI	Women	16	rs6499129	67458251	rs9933206	67539022	0.722737	20502693	2.3e-06	Gene expression of SLC7A6 in peripheral blood monocytes	Gene expression in monocytes	European	3852							eQTL
WHRadjBMI	Women	16	rs6499129	67458251	rs8044843	67318242	0.748077	21355061	0.013	Urinary albumin-to-creatinine ratio	Albuminuria, in urine	European	94437	PLEKHG4	(rs8044843(miR-145);(AB197664);(derived allele creates new site);GUWobble)	Missense	Q58EX7:D525G;A>G;benign;0;1;1	D525G:(D>G);(0.57>0.84);(TOLERATED>TOLERATED)	(PKHG4;VARIANT;525-525;D -> G (in dbSNP:rs8044843). /FTId=VAR_050510.)
WHRadjBMI	Women	16	rs6499129	67458251	rs8044843	67318242	0.748077	21829388	2e-17	Gene expression of TRADD in blood	Gene expression in blood cells	European	4724	PLEKHG4	(rs8044843(miR-145);(AB197664);(derived allele creates new site);GUWobble)	Missense	Q58EX7:D525G;A>G;benign;0;1;1	D525G:(D>G);(0.57>0.84);(TOLERATED>TOLERATED)	(PKHG4;VARIANT;525-525;D -> G (in dbSNP:rs8044843). /FTId=VAR_050510.)	eQTL
WHRadjBMI	Women	16	rs6499129	67458251	rs8044843	67318242	0.748077	21829388	0.00063	Gene expression of AC009061.7///ZDHHC1 in blood	Gene expression in blood cells	European	4724	PLEKHG4	(rs8044843(miR-145);(AB197664);(derived allele creates new site);GUWobble)	Missense	Q58EX7:D525G;A>G;benign;0;1;1	D525G:(D>G);(0.57>0.84);(TOLERATED>TOLERATED)	(PKHG4;VARIANT;525-525;D -> G (in dbSNP:rs8044843). /FTId=VAR_050510.)	eQTL
WHRadjBMI	Women	16	rs6499129	67458251	rs8044843	67318242	0.748077	21829388	0.00067	Gene expression of LRRC29 in blood	Gene expression in blood cells	European	4724	PLEKHG4	(rs8044843(miR-145);(AB197664);(derived allele creates new site);GUWobble)	Missense	Q58EX7:D525G;A>G;benign;0;1;1	D525G:(D>G);(0.57>0.84);(TOLERATED>TOLERATED)	(PKHG4;VARIANT;525-525;D -> G (in dbSNP:rs8044843). /FTId=VAR_050510.)	eQTL
WHRadjBMI	Women	16	rs6499129	67458251	rs8044843	67318242	0.748077	21829388	7.9e-22	Gene expression of HSD11B2///ATP6V0D1 in blood	Gene expression in blood cells	European	4724	PLEKHG4	(rs8044843(miR-145);(AB197664);(derived allele creates new site);GUWobble)	Missense	Q58EX7:D525G;A>G;benign;0;1;1	D525G:(D>G);(0.57>0.84);(TOLERATED>TOLERATED)	(PKHG4;VARIANT;525-525;D -> G (in dbSNP:rs8044843). /FTId=VAR_050510.)	eQTL
WHRadjBMI	Women	16	rs6499129	67458251	rs8044843	67318242	0.748077	20383146	0.05	Chronic kidney disease	Chronic kidney disease (CKD) and renal traits	European	157168	PLEKHG4	(rs8044843(miR-145);(AB197664);(derived allele creates new site);GUWobble)	Missense	Q58EX7:D525G;A>G;benign;0;1;1	D525G:(D>G);(0.57>0.84);(TOLERATED>TOLERATED)	(PKHG4;VARIANT;525-525;D -> G (in dbSNP:rs8044843). /FTId=VAR_050510.)
WHRadjBMI	Women	16	rs6499129	67458251	rs8044843	67318242	0.748077	19503088	0.008055	Rheumatoid arthritis	Rheumatoid arthritis	European	19330	PLEKHG4	(rs8044843(miR-145);(AB197664);(derived allele creates new site);GUWobble)	Missense	Q58EX7:D525G;A>G;benign;0;1;1	D525G:(D>G);(0.57>0.84);(TOLERATED>TOLERATED)	(PKHG4;VARIANT;525-525;D -> G (in dbSNP:rs8044843). /FTId=VAR_050510.)
WHRadjBMI	Women	16	rs6499129	67458251	rs8044843	67318242	0.748077	20935629	0.036	Waist hip ratio	Waist:hip ratio	European	267970	PLEKHG4	(rs8044843(miR-145);(AB197664);(derived allele creates new site);GUWobble)	Missense	Q58EX7:D525G;A>G;benign;0;1;1	D525G:(D>G);(0.57>0.84);(TOLERATED>TOLERATED)	(PKHG4;VARIANT;525-525;D -> G (in dbSNP:rs8044843). /FTId=VAR_050510.)
WHRadjBMI	Women	16	rs6499129	67458251	rs8044843	67318242	0.748077	20686565	0.02573	HDL cholesterol	Lipid level measurements	Mixed	240243	PLEKHG4	(rs8044843(miR-145);(AB197664);(derived allele creates new site);GUWobble)	Missense	Q58EX7:D525G;A>G;benign;0;1;1	D525G:(D>G);(0.57>0.84);(TOLERATED>TOLERATED)	(PKHG4;VARIANT;525-525;D -> G (in dbSNP:rs8044843). /FTId=VAR_050510.)
WHRadjBMI	Women	16	rs6499129	67458251	rs9921926	67394411	0.780103	20686565	0.03053	HDL cholesterol	Lipid level measurements	Mixed	240243	LRRC36		Intron
WHRadjBMI	Women	16	rs6499129	67458251	rs9921926	67394411	0.780103	20881960	0.00196	Height	Height	European	317380	LRRC36		Intron
WHRadjBMI	Women	16	rs6499129	67458251	rs9921926	67394411	0.780103	20935629	0.0076	Waist hip ratio	Waist:hip ratio	European	267970	LRRC36		Intron
WHRadjBMI	Women	16	rs6499129	67458251	rs9921926	67394411	0.780103	20383146	0.007	Serum creatinine	Chronic kidney disease (CKD) and renal traits	European	157168	LRRC36		Intron
WHRadjBMI	Women	16	rs6499129	67458251	rs9921926	67394411	0.780103	20935630	0.0396	Body mass index (BMI)	Body mass index (BMI)	European	373661	LRRC36		Intron
WHRadjBMI	Women	16	rs6499129	67458251	rs8052852	67394890	0.780103	20935630	0.0484	Body mass index (BMI)	Body mass index (BMI)	European	373661	LRRC36		Intron
WHRadjBMI	Women	16	rs6499129	67458251	rs8052852	67394890	0.780103	20383146	0.033	Chronic kidney disease	Chronic kidney disease (CKD) and renal traits	European	157168	LRRC36		Intron
WHRadjBMI	Women	16	rs6499129	67458251	rs8052852	67394890	0.780103	20383146	0.0068	Serum creatinine	Chronic kidney disease (CKD) and renal traits	European	157168	LRRC36		Intron
WHRadjBMI	Women	16	rs6499129	67458251	rs8052852	67394890	0.780103	20881960	0.002432	Height	Height	European	317380	LRRC36		Intron
WHRadjBMI	Women	16	rs6499129	67458251	rs8047080	67402588	0.780103	21829388	1.7e-18	Gene expression of HSD11B2///ATP6V0D1 in blood	Gene expression in blood cells	European	4724	LRRC36		Intron				eQTL
WHRadjBMI	Women	16	rs6499129	67458251	rs8047080	67402588	0.780103	22182935	0.02811	Bipolar disorder	Bipolar disorder	Mixed	33353	LRRC36		Intron
WHRadjBMI	Women	16	rs6499129	67458251	rs8047080	67402588	0.780103	20881960	0.002959	Height	Height	European	317380	LRRC36		Intron
WHRadjBMI	Women	16	rs6499129	67458251	rs8047080	67402588	0.780103	21829388	4.2e-28	Gene expression of TRADD in blood	Gene expression in blood cells	European	4724	LRRC36		Intron				eQTL
WHRadjBMI	Women	16	rs6499129	67458251	rs8047080	67402588	0.780103	20686565	2.75e-05	HDL cholesterol	Lipid level measurements	Mixed	240243	LRRC36		Intron
WHRadjBMI	Women	16	rs6499129	67458251	rs8047080	67402588	0.780103	20383146	0.029	Cystatin C in serum	Chronic kidney disease (CKD) and renal traits	European	157168	LRRC36		Intron
WHRadjBMI	Women	16	rs6499129	67458251	rs8047080	67402588	0.780103	18668548	0.02346	Arthritis including non-Rheumatoid	Rheumatoid arthritis	European	2404	LRRC36		Intron
WHRadjBMI	Women	16	rs6499129	67458251	rs8047080	67402588	0.780103	21829388	0.0015	Gene expression of C16orf70 in blood	Gene expression in blood cells	European	4724	LRRC36		Intron				eQTL
WHRadjBMI	Women	16	rs6499129	67458251	rs8047080	67402588	0.780103	20081858	0.01742	Fasting blood glucose	Glucose homeostasis traits (fasting glucose, fasting insulin, HOMA-B, HOMA-IR)	European	168930	LRRC36		Intron
WHRadjBMI	Women	16	rs6499129	67458251	rs8047080	67402588	0.780103	20383146	0.041	Chronic kidney disease	Chronic kidney disease (CKD) and renal traits	European	157168	LRRC36		Intron
WHRadjBMI	Women	16	rs6499129	67458251	rs8047080	67402588	0.780103	20935629	0.044	Waist hip ratio	Waist:hip ratio	European	267970	LRRC36		Intron
WHRadjBMI	Women	16	rs6499129	67458251	rs7205526	67410583	0.780103	20881960	0.001979	Height	Height	European	317380	LRRC36		Intron
WHRadjBMI	Women	16	rs6499129	67458251	rs7205526	67410583	0.780103	20935630	0.0433	Body mass index (BMI)	Body mass index (BMI)	European	373661	LRRC36		Intron
WHRadjBMI	Women	16	rs6499129	67458251	rs7205526	67410583	0.780103	20383146	0.033	Chronic kidney disease	Chronic kidney disease (CKD) and renal traits	European	157168	LRRC36		Intron
WHRadjBMI	Women	16	rs6499129	67458251	rs7205526	67410583	0.780103	20935629	0.0089	Waist hip ratio	Waist:hip ratio	European	267970	LRRC36		Intron
WHRadjBMI	Women	16	rs6499129	67458251	rs9934827	67413003	0.780103	20383146	0.041	Chronic kidney disease	Chronic kidney disease (CKD) and renal traits	European	157168	LRRC36		Intron
WHRadjBMI	Women	16	rs6499129	67458251	rs9934827	67413003	0.780103	20935629	0.037	Waist hip ratio	Waist:hip ratio	European	267970	LRRC36		Intron
WHRadjBMI	Women	16	rs6499129	67458251	rs9934827	67413003	0.780103	20383146	0.026	Cystatin C in serum	Chronic kidney disease (CKD) and renal traits	European	157168	LRRC36		Intron
WHRadjBMI	Women	16	rs6499129	67458251	rs9934827	67413003	0.780103	20881960	0.002023	Height	Height	European	317380	LRRC36		Intron
WHRadjBMI	Women	16	rs6499129	67458251	rs9934827	67413003	0.780103	20081858	0.009485	Fasting blood glucose	Glucose homeostasis traits (fasting glucose, fasting insulin, HOMA-B, HOMA-IR)	European	168930	LRRC36		Intron
WHRadjBMI	Women	16	rs6499129	67458251	rs8059722	67440389	0.79651	20935629	0.0099	Waist hip ratio	Waist:hip ratio	European	267970	ZDHHC1		Intron
WHRadjBMI	Women	16	rs6499129	67458251	rs8059722	67440389	0.79651	20383146	0.035	Chronic kidney disease	Chronic kidney disease (CKD) and renal traits	European	157168	ZDHHC1		Intron
WHRadjBMI	Women	16	rs6499129	67458251	rs8059722	67440389	0.79651	20383146	0.0073	Serum creatinine	Chronic kidney disease (CKD) and renal traits	European	157168	ZDHHC1		Intron
WHRadjBMI	Women	16	rs6499129	67458251	rs8047159	67453634	0.750025	20935629	0.016	Waist hip ratio	Waist:hip ratio	European	267970
WHRadjBMI	Women	16	rs6499129	67458251	rs8047159	67453634	0.750025	20686565	0.01205	HDL cholesterol	Lipid level measurements	Mixed	240243
WHRadjBMI	Women	16	rs6499129	67458251	rs9936153	67455516	0.817985	20383146	0.049	Chronic kidney disease	Chronic kidney disease (CKD) and renal traits	European	157168
WHRadjBMI	Women	16	rs6499129	67458251	rs9936153	67455516	0.817985	20935629	0.019	Waist hip ratio	Waist:hip ratio	European	267970
WHRadjBMI	Women	16	rs6499129	67458251	rs9936306	67455559	0.724145	20935629	0.0095	Waist hip ratio	Waist:hip ratio	European	267970
WHRadjBMI	Women	16	rs6499129	67458251	rs9936306	67455559	0.724145	20935630	0.0432	Body mass index (BMI)	Body mass index (BMI)	European	373661
WHRadjBMI	Women	16	rs6499129	67458251	rs9936306	67455559	0.724145	20881960	0.00386	Height	Height	European	317380
WHRadjBMI	Women	16	rs6499129	67458251	rs9936306	67455559	0.724145	20383146	0.0089	Serum creatinine	Chronic kidney disease (CKD) and renal traits	European	157168
WHRadjBMI	Women	16	rs6499129	67458251	rs6499129	67458251	1	21060006	0.0359	Systolic blood pressure (SBP), 24 hour mean	Blood pressure	European	12169
WHRadjBMI	Women	16	rs6499129	67458251	rs6499129	67458251	1	20935629	0.02	Waist hip ratio	Waist:hip ratio	European	267970
WHRadjBMI	Women	16	rs6499129	67458251	rs8056260	67476572	0.762431	20881960	0.00472	Height	Height	European	317380	ATP6V0D1		Intron
WHRadjBMI	Women	16	rs6499129	67458251	rs8056260	67476572	0.762431	20935630	0.0432	Body mass index (BMI)	Body mass index (BMI)	European	373661	ATP6V0D1		Intron
WHRadjBMI	Women	16	rs6499129	67458251	rs8056260	67476572	0.762431	20383146	0.0091	Serum creatinine	Chronic kidney disease (CKD) and renal traits	European	157168	ATP6V0D1		Intron
WHRadjBMI	Women	16	rs6499129	67458251	rs8056260	67476572	0.762431	20935629	0.0099	Waist hip ratio	Waist:hip ratio	European	267970	ATP6V0D1		Intron
WHRadjBMI	Women	16	rs6499129	67458251	rs9922476	67478924	0.768981	20383146	0.0099	Serum creatinine	Chronic kidney disease (CKD) and renal traits	European	157168	ATP6V0D1		Intron
WHRadjBMI	Women	16	rs6499129	67458251	rs9922476	67478924	0.768981	20935629	0.0094	Waist hip ratio	Waist:hip ratio	European	267970	ATP6V0D1		Intron
WHRadjBMI	Women	16	rs6499129	67458251	rs9922476	67478924	0.768981	20383146	0.027	Chronic kidney disease	Chronic kidney disease (CKD) and renal traits	European	157168	ATP6V0D1		Intron
WHRadjBMI	Women	16	rs6499129	67458251	rs9922476	67478924	0.768981	20881960	0.00375	Height	Height	European	317380	ATP6V0D1		Intron
WHRadjBMI	Women	16	rs6499129	67458251	rs9922624	67478976	0.741395	20383146	0.046	Chronic kidney disease	Chronic kidney disease (CKD) and renal traits	European	157168	ATP6V0D1		Intron
WHRadjBMI	Women	16	rs6499129	67458251	rs9922624	67478976	0.741395	21829388	2.9e-06	Gene expression of AC009061.7 in blood	Gene expression in blood cells	European	4724	ATP6V0D1		Intron				eQTL
WHRadjBMI	Women	16	rs6499129	67458251	rs9922624	67478976	0.741395	21829388	5.2e-07	Gene expression of AC009061.7///ZDHHC1 in blood	Gene expression in blood cells	European	4724	ATP6V0D1		Intron				eQTL
WHRadjBMI	Women	16	rs6499129	67458251	rs9922624	67478976	0.741395	21124317	0.04442	Neuroblastoma (brain cancer)	Neuroblastoma	European	13229	ATP6V0D1		Intron
WHRadjBMI	Women	16	rs6499129	67458251	rs9922624	67478976	0.741395	21829388	0.00048	Gene expression of C16orf86 in blood	Gene expression in blood cells	European	4724	ATP6V0D1		Intron				eQTL
WHRadjBMI	Women	16	rs6499129	67458251	rs9922624	67478976	0.741395	21637794	0.0115723	Gene expression of FAM65A [transcript NM_024519, probe A_24_P7232] in liver	Gene expression in liver	European/Unspecified	1064	ATP6V0D1		Intron				eQTL
WHRadjBMI	Women	16	rs6499129	67458251	rs9922624	67478976	0.741395	20935629	0.022	Waist hip ratio	Waist:hip ratio	European	267970	ATP6V0D1		Intron
WHRadjBMI	Women	16	rs6499129	67458251	rs8063771	67506115	0.746289	20686565	0.02361	HDL cholesterol	Lipid level measurements	Mixed	240243	ATP6V0D1		Intron
WHRadjBMI	Women	16	rs6499129	67458251	rs8063771	67506115	0.746289	20935629	0.026	Waist hip ratio	Waist:hip ratio	European	267970	ATP6V0D1		Intron
WHRadjBMI	Women	16	rs6499129	67458251	rs8063771	67506115	0.746289	20383146	0.047	Chronic kidney disease	Chronic kidney disease (CKD) and renal traits	European	157168	ATP6V0D1		Intron
WHRadjBMI	Women	16	rs6499129	67458251	rs3893749	67533298	0.721157	20383146	0.0099	Serum creatinine	Chronic kidney disease (CKD) and renal traits	European	157168
WHRadjBMI	Women	16	rs6499129	67458251	rs3893749	67533298	0.721157	20383146	0.023	Chronic kidney disease	Chronic kidney disease (CKD) and renal traits	European	157168
WHRadjBMI	Women	16	rs6499129	67458251	rs3893749	67533298	0.721157	20935629	0.0093	Waist hip ratio	Waist:hip ratio	European	267970
WHRadjBMI	Women	16	rs6499129	67458251	rs3893749	67533298	0.721157	20935630	0.0416	Body mass index (BMI)	Body mass index (BMI)	European	373661
WHRadjBMI	Women	16	rs6499129	67458251	rs4380048	67538193	0.730227	20935629	0.0087	Waist hip ratio	Waist:hip ratio	European	267970
WHRadjBMI	Women	16	rs6499129	67458251	rs4380048	67538193	0.730227	20383146	0.022	Chronic kidney disease	Chronic kidney disease (CKD) and renal traits	European	157168
WHRadjBMI	Women	16	rs6499129	67458251	rs4380048	67538193	0.730227	20935630	0.0486	Body mass index (BMI)	Body mass index (BMI)	European	373661
WHRadjBMI	Women	16	rs6499129	67458251	rs4380048	67538193	0.730227	20383146	0.0092	Serum creatinine	Chronic kidney disease (CKD) and renal traits	European	157168
WHRadjBMI	Women	16	rs6499129	67458251	rs9933102	67538910	0.730227	20881960	0.00283	Height	Height	European	317380
WHRadjBMI	Women	16	rs6499129	67458251	rs9933102	67538910	0.730227	17554300	0.0005697	Bipolar disorder	Multiple traits (bipolar disorder, coronary artery disease, Crohn's disease, rheumatoid arthritis, T1D, T2D, hypertension)	European	9612
WHRadjBMI	Women	16	rs6499129	67458251	rs9933102	67538910	0.730227	20502693	2.48e-19	Gene expression of AGRP in peripheral blood monocytes	Gene expression in monocytes	European	3852							eQTL
WHRadjBMI	Women	16	rs6499129	67458251	rs9933102	67538910	0.730227	20383146	0.02	Chronic kidney disease	Chronic kidney disease (CKD) and renal traits	European	157168
WHRadjBMI	Women	16	rs6499129	67458251	rs9933102	67538910	0.730227	20383146	0.0078	Serum creatinine	Chronic kidney disease (CKD) and renal traits	European	157168
WHRadjBMI	Women	16	rs6499129	67458251	rs9933102	67538910	0.730227	20935630	0.0424	Body mass index (BMI)	Body mass index (BMI)	European	373661
WHRadjBMI	Women	16	rs6499129	67458251	rs9933102	67538910	0.730227	20502693	3.96e-11	Gene expression of ZDHHC1 in peripheral blood monocytes	Gene expression in monocytes	European	3852							eQTL
WHRadjBMI	Women	16	rs6499129	67458251	rs9933102	67538910	0.730227	20502693	7.38e-10	Gene expression of SLC7A6 in peripheral blood monocytes	Gene expression in monocytes	European	3852							eQTL
WHRadjBMI	Women	16	rs6499129	67458251	rs9933102	67538910	0.730227	20502693	4.45e-09	Gene expression of TRADD in peripheral blood monocytes	Gene expression in monocytes	European	3852							eQTL
WHRadjBMI	Women	16	rs6499129	67458251	rs9933102	67538910	0.730227	20502693	0	Gene expression of DUS2L in peripheral blood monocytes	Gene expression in monocytes	European	3852							eQTL
WHRadjBMI	Women	16	rs6499129	67458251	rs9933102	67538910	0.730227	20935629	0.011	Waist hip ratio	Waist:hip ratio	European	267970
WHRadjBMI	Women	16	rs6499129	67458251	rs9933102	67538910	0.730227	20383146	0.049	Cystatin C in serum	Chronic kidney disease (CKD) and renal traits	European	157168
WHRadjBMI	Women	16	rs6499129	67458251	rs9933102	67538910	0.730227	20502693	2.02e-14	Gene expression of ATP6V0D1 in peripheral blood monocytes	Gene expression in monocytes	European	3852							eQTL
WHRadjBMI	Women	16	rs6499129	67458251	rs9933206	67539022	0.722737	20383146	0.0043	Cystatin C in serum	Chronic kidney disease (CKD) and renal traits	European	157168
WHRadjBMI	Women	16	rs6499129	67458251	rs9933206	67539022	0.722737	20502693	9.45e-06	Gene expression of PARD6A in peripheral blood monocytes	Gene expression in monocytes	European	3852							eQTL
WHRadjBMI	Women	16	rs6499129	67458251	rs9933206	67539022	0.722737	20502693	0	Gene expression of DUS2L in peripheral blood monocytes	Gene expression in monocytes	European	3852							eQTL
WHRadjBMI	Women	16	rs6499129	67458251	rs9933206	67539022	0.722737	20502693	1.65e-06	Gene expression of RPL36A in peripheral blood monocytes	Gene expression in monocytes	European	3852							eQTL
WHRadjBMI	Women	16	rs6499129	67458251	rs9933206	67539022	0.722737	20383146	0.0041	Serum creatinine	Chronic kidney disease (CKD) and renal traits	European	157168
WHRadjBMI	Women	16	rs6499129	67458251	rs9933206	67539022	0.722737	20502693	1.31e-08	Gene expression of GFOD2 in peripheral blood monocytes	Gene expression in monocytes	European	3852							eQTL
WHRadjBMI	Women	16	rs6499129	67458251	rs9933206	67539022	0.722737	20502693	3.86e-07	Gene expression of AGRP in peripheral blood monocytes	Gene expression in monocytes	European	3852							eQTL
WHRadjBMI	Women	16	rs6499129	67458251	rs9933206	67539022	0.722737	20502693	1.44e-07	Gene expression of ZDHHC1 in peripheral blood monocytes	Gene expression in monocytes	European	3852							eQTL
WHRadjBMI	Women	16	rs6499129	67458251	rs9933206	67539022	0.722737	20502693	2.1e-06	Gene expression of CTSK in peripheral blood monocytes	Gene expression in monocytes	European	3852							eQTL
WHRadjBMI	Women	16	rs6499129	67458251	rs9933206	67539022	0.722737	20502693	9.85e-06	Gene expression of PEX19 in peripheral blood monocytes	Gene expression in monocytes	European	3852							eQTL
WHRadjBMI	Women	16	rs6499129	67458251	rs9933206	67539022	0.722737	20502693	2.31e-10	Gene expression of ATP6V0D1 in peripheral blood monocytes	Gene expression in monocytes	European	3852							eQTL
WHRadjBMI	Women	16	rs6499129	67458251	rs16957291	67326102	0.748077	21355061	0.024	Urinary albumin-to-creatinine ratio	Albuminuria, in urine	European	94437	KCTD19		Intron
WHRadjBMI	Women	16	rs6499129	67458251	rs11859352	67390448	0.764805	19503088	0.009534	Rheumatoid arthritis	Rheumatoid arthritis	European	19330	LRRC36		Intron
WHRadjBMI	Women	16	rs6499129	67458251	rs16957378	67409770	0.780103	20383146	0.033	Chronic kidney disease	Chronic kidney disease (CKD) and renal traits	European	157168	LRRC36		Intron
WHRadjBMI	Women	16	rs6499129	67458251	rs1053612	67423939	0.780103	23202124	0.0054	Birth weight	Birth weight	European	96191	TPPP3		3'UTR
WHRadjBMI	Women	16	rs6499129	67458251	rs897901	67425198	0.780103	23202124	0.0053	Birth weight	Birth weight	European	96191	TPPP3		Intron
WHRadjBMI	Women	16	rs6499129	67458251	rs921982	67461429	0.762431	23468642	1.4e-05	Myopia	Myopia	European	99865
WHRadjBMI	Women	16	rs6499129	67458251	rs11860837	67480263	0.768981	20881960	0.003974	Height	Height	European	317380	ATP6V0D1		Intron
WHRadjBMI	Women	16	rs6499129	67458251	rs13338993	67515312	0.846289	20383146	0.049	Chronic kidney disease	Chronic kidney disease (CKD) and renal traits	European	157168			5' of gene within 2000bp
WHRadjBMI	Women	16	rs6499129	67458251	rs13338499	67520123	0.819652	20502693	9.77e-07	Gene expression of PARD6A in peripheral blood monocytes	Gene expression in monocytes	European	3852							eQTL
WHRadjBMI	Women	16	rs6499129	67458251	rs16957291	67326102	0.748077	20935629	0.044	Waist hip ratio	Waist:hip ratio	European	267970	KCTD19		Intron
WHRadjBMI	Women	16	rs6499129	67458251	rs16957291	67326102	0.748077	20686565	2.98e-07	HDL cholesterol	Lipid level measurements	Mixed	240243	KCTD19		Intron
WHRadjBMI	Women	16	rs6499129	67458251	rs16957291	67326102	0.748077	20383146	0.048	Chronic kidney disease	Chronic kidney disease (CKD) and renal traits	European	157168	KCTD19		Intron
WHRadjBMI	Women	16	rs6499129	67458251	rs16957291	67326102	0.748077	20081858	0.01291	Fasting blood glucose	Glucose homeostasis traits (fasting glucose, fasting insulin, HOMA-B, HOMA-IR)	European	168930	KCTD19		Intron
WHRadjBMI	Women	16	rs6499129	67458251	rs11859352	67390448	0.764805	21829388	7.6e-18	Gene expression of TRADD in blood	Gene expression in blood cells	European	4724	LRRC36		Intron				eQTL
WHRadjBMI	Women	16	rs6499129	67458251	rs11859352	67390448	0.764805	21829388	1.1e-21	Gene expression of HSD11B2///ATP6V0D1 in blood	Gene expression in blood cells	European	4724	LRRC36		Intron				eQTL
WHRadjBMI	Women	16	rs6499129	67458251	rs11859352	67390448	0.764805	21355061	0.043	Urinary albumin-to-creatinine ratio	Albuminuria, in urine	European	94437	LRRC36		Intron
WHRadjBMI	Women	16	rs6499129	67458251	rs11859352	67390448	0.764805	20953190	3.44e-07	Psoriasis (HLA-C risk allele negative)	Psoriasis	European	23344	LRRC36		Intron
WHRadjBMI	Women	16	rs6499129	67458251	rs11859352	67390448	0.764805	20383146	0.047	Chronic kidney disease	Chronic kidney disease (CKD) and renal traits	European	157168	LRRC36		Intron
WHRadjBMI	Women	16	rs6499129	67458251	rs11859352	67390448	0.764805	20686565	3.82e-07	HDL cholesterol	Lipid level measurements	Mixed	240243	LRRC36		Intron
WHRadjBMI	Women	16	rs6499129	67458251	rs11859352	67390448	0.764805	20081858	0.01904	Fasting blood glucose	Glucose homeostasis traits (fasting glucose, fasting insulin, HOMA-B, HOMA-IR)	European	168930	LRRC36		Intron
WHRadjBMI	Women	16	rs6499129	67458251	rs11859352	67390448	0.764805	21829388	0.00078	Gene expression of LRRC29 in blood	Gene expression in blood cells	European	4724	LRRC36		Intron				eQTL
WHRadjBMI	Women	16	rs6499129	67458251	rs11859352	67390448	0.764805	21829388	0.00055	Gene expression of AC009061.7///ZDHHC1 in blood	Gene expression in blood cells	European	4724	LRRC36		Intron				eQTL
WHRadjBMI	Women	16	rs6499129	67458251	rs16957378	67409770	0.780103	20881960	0.001979	Height	Height	European	317380	LRRC36		Intron
WHRadjBMI	Women	16	rs6499129	67458251	rs16957378	67409770	0.780103	20383146	0.0064	Serum creatinine	Chronic kidney disease (CKD) and renal traits	European	157168	LRRC36		Intron
WHRadjBMI	Women	16	rs6499129	67458251	rs16957378	67409770	0.780103	20935630	0.0404	Body mass index (BMI)	Body mass index (BMI)	European	373661	LRRC36		Intron
WHRadjBMI	Women	16	rs6499129	67458251	rs16957378	67409770	0.780103	20935629	0.0088	Waist hip ratio	Waist:hip ratio	European	267970	LRRC36		Intron
WHRadjBMI	Women	16	rs6499129	67458251	rs11860837	67480263	0.768981	20935629	0.0096	Waist hip ratio	Waist:hip ratio	European	267970	ATP6V0D1		Intron
WHRadjBMI	Women	16	rs6499129	67458251	rs11860837	67480263	0.768981	20935630	0.0486	Body mass index (BMI)	Body mass index (BMI)	European	373661	ATP6V0D1		Intron
WHRadjBMI	Women	16	rs6499129	67458251	rs11860837	67480263	0.768981	20383146	0.011	Serum creatinine	Chronic kidney disease (CKD) and renal traits	European	157168	ATP6V0D1		Intron
WHRadjBMI	Women	16	rs6499129	67458251	rs11860837	67480263	0.768981	20383146	0.028	Chronic kidney disease	Chronic kidney disease (CKD) and renal traits	European	157168	ATP6V0D1		Intron
WHRadjBMI	Women	16	rs6499129	67458251	rs13338993	67515312	0.846289	20935629	0.022	Waist hip ratio	Waist:hip ratio	European	267970			5' of gene within 2000bp
WHRadjBMI	Women	16	rs6499129	67458251	rs13338993	67515312	0.846289	20686565	0.04171	HDL cholesterol	Lipid level measurements	Mixed	240243			5' of gene within 2000bp
WHRadjBMI	Women	16	rs6499129	67458251	rs13338499	67520123	0.819652	20502693	3.14e-06	Gene expression of RPL36A in peripheral blood monocytes	Gene expression in monocytes	European	3852							eQTL
WHRadjBMI	Women	16	rs6499129	67458251	rs13338499	67520123	0.819652	20502693	3.23e-07	Gene expression of TRADD in peripheral blood monocytes	Gene expression in monocytes	European	3852							eQTL
WHRadjBMI	Women	16	rs6499129	67458251	rs13338499	67520123	0.819652	20502693	4.9e-06	Gene expression of ELMO3 in peripheral blood monocytes	Gene expression in monocytes	European	3852							eQTL
WHRadjBMI	Women	16	rs6499129	67458251	rs13338499	67520123	0.819652	20502693	8.69e-10	Gene expression of GFOD2 in peripheral blood monocytes	Gene expression in monocytes	European	3852							eQTL
WHRadjBMI	Women	16	rs6499129	67458251	rs13338499	67520123	0.819652	20502693	6.29e-06	Gene expression of ATP6V0D1 in peripheral blood monocytes	Gene expression in monocytes	European	3852							eQTL
WHRadjBMI	Women	16	rs6499129	67458251	rs13338499	67520123	0.819652	20502693	-	Gene expression of DUS2L in peripheral blood monocytes	Gene expression in monocytes	European	3852							eQTL
WHRadjBMI	Women	16	rs6499129	67458251	rs13338499	67520123	0.819652	20502693	5.63e-06	Gene expression of LRRC29 in peripheral blood monocytes	Gene expression in monocytes	European	3852							eQTL
WHRadjBMI	Women	16	rs6499129	67458251	rs8044843	67318242	0.748077	22479346	0.0348986	Hypertension (early onset hypertension)	Hypertension	Mixed	6918	PLEKHG4	(rs8044843(miR-145);(AB197664);(derived allele creates new site);GUWobble)	Missense	Q58EX7:D525G;A>G;benign;0;1;1	D525G:(D>G);(0.57>0.84);(TOLERATED>TOLERATED)
WHRadjBMI	Women	16	rs6499129	67458251	rs16957291	67326102	0.748077	23202124	0.016	Birth weight	Birth weight	European	96191	KCTD19		Intron
WHRadjBMI	Women	16	rs6499129	67458251	rs1471143	67386349	0.780103	22522925	0.0003846	Gene expression of TRADD (probeID ILMN_1765851) in breast tumors	Gene expression in breast tumors	Unspecified	1994	LRRC36		Intron				eQTL
WHRadjBMI	Women	16	rs6499129	67458251	rs11859352	67390448	0.764805	22479346	0.0348986	Hypertension (early onset hypertension)	Hypertension	Mixed	6918	LRRC36		Intron
WHRadjBMI	Women	16	rs6499129	67458251	rs9921926	67394411	0.780103	23202124	0.017	Birth weight	Birth weight	European	96191	LRRC36		Intron
WHRadjBMI	Women	16	rs6499129	67458251	rs8052852	67394890	0.780103	23202124	0.017	Birth weight	Birth weight	European	96191	LRRC36		Intron
WHRadjBMI	Women	16	rs6499129	67458251	rs8047080	67402588	0.780103	23202124	0.013	Birth weight	Birth weight	European	96191	LRRC36		Intron
WHRadjBMI	Women	16	rs6499129	67458251	rs16957378	67409770	0.780103	23202124	0.016	Birth weight	Birth weight	European	96191	LRRC36		Intron
WHRadjBMI	Women	16	rs6499129	67458251	rs7205526	67410583	0.780103	23202124	0.016	Birth weight	Birth weight	European	96191	LRRC36		Intron
WHRadjBMI	Women	16	rs6499129	67458251	rs9934827	67413003	0.780103	23202124	0.0057	Birth weight	Birth weight	European	96191	LRRC36		Intron
WHRadjBMI	Women	16	rs6499129	67458251	rs1862689	67419152	0.764805	23202124	0.019	Birth weight	Birth weight	European	96191			Intron
WHRadjBMI	Women	16	rs6499129	67458251	rs8059722	67440389	0.79651	23202124	0.015	Birth weight	Birth weight	European	96191	ZDHHC1		Intron
WHRadjBMI	Women	16	rs6499129	67458251	rs9936306	67455559	0.724145	23468642	1.1e-05	Myopia	Myopia	European	99865
WHRadjBMI	Women	16	rs6499129	67458251	rs55639853	67459078	0.724145	23468642	1.4e-05	Myopia	Myopia	European	99865
WHRadjBMI	Women	16	rs6499129	67458251	rs28473376	67459309	0.807193	23468642	1.5e-05	Myopia	Myopia	European	99865
WHRadjBMI	Women	16	rs6499129	67458251	rs8056260	67476572	0.762431	23202124	0.015	Birth weight	Birth weight	European	96191	ATP6V0D1		Intron
WHRadjBMI	Women	16	rs6499129	67458251	rs9922476	67478924	0.768981	23202124	0.015	Birth weight	Birth weight	European	96191	ATP6V0D1		Intron
WHRadjBMI	Women	16	rs6499129	67458251	rs9922624	67478976	0.741395	22377632	0.02508	Paternal transmission distortion	Transmission distortion	European	9456	ATP6V0D1		Intron
WHRadjBMI	Women	16	rs6499129	67458251	rs11860837	67480263	0.768981	23202124	0.015	Birth weight	Birth weight	European	96191	ATP6V0D1		Intron
WHRadjBMI	Women	16	rs6499129	67458251	rs3893749	67533298	0.721157	23202124	0.013	Birth weight	Birth weight	European	96191			Intron
WHRadjBMI	Women	16	rs6499129	67458251	rs4380048	67538193	0.730227	22451204	0.04424	Parkinson's disease	Parkinson's disease	European	22803			Intron
WHRadjBMI	Women	16	rs6499129	67458251	rs9933102	67538910	0.730227	22451204	0.03862	Parkinson's disease	Parkinson's disease	European	22803
WHRadjBMI	Women	16	rs6499129	67458251	rs1471143	67386349	0.780103	23202124	0.0085	Birth weight	Birth weight	European	96191	LRRC36		Intron
WHRadjBMI	Women	16	rs6499129	67458251	rs11859352	67390448	0.764805	23202124	0.038	Birth weight	Birth weight	European	96191	LRRC36		Intron
WHRadjBMI	Women	16	rs6499129	67458251	rs9934827	67413003	0.780103	23468642	2.7e-05	Myopia	Myopia	European	99865	LRRC36		Intron
WHRadjBMI	Women	16	rs6499129	67458251	rs9936306	67455559	0.724145	22780124	0.001678	Disordered gambling	Disordered gambling	European	2624
WHRadjBMI	Women	16	rs6499129	67458251	rs9936306	67455559	0.724145	23202124	0.015	Birth weight	Birth weight	European	96191
WHRadjBMI	Women	16	rs6499129	67458251	rs3893749	67533298	0.721157	22451204	0.04656	Parkinson's disease	Parkinson's disease	European	22803			Intron
WHRadjBMI	Women	16	rs6499129	67458251	rs4380048	67538193	0.730227	23202124	0.013	Birth weight	Birth weight	European	96191			Intron
WHRadjBMI	Women	16	rs6499129	67458251	rs9933102	67538910	0.730227	23202124	0.013	Birth weight	Birth weight	European	96191
AAAGC: African Ancestry Anthropometry Genetics Consortium; Chr: chromosome; eQTL: expression quantitative trait locus; GRASP: Genome-Wide Repository of Associations Between SNPs and Phenotypes; miRNA: microRNA target binding sites; WHRadjBMI: waist-to-hip ratio adjusted for BMI
POLYPHEN2 score, SIFT, UNIPROT: amino acid changes and their predicted consequences and post-translational modifications
a based on 1000 Genomes reference panel, this chromosome:position maps to rs77684264
