# Supplementary material for: Discovery and fine-mapping of adiposity loci using high density imputation of genome-wide association studies in individuals of African ancestry: African Ancestry Anthropometry Genetics Consortium
Source: PLoS Genet. 2017 Apr 21;13(4):e1006719. doi: 10.1371/journal.pgen.1006719 (PMC5419579; doi:10.1371/journal.pgen.1006719)
Supplement: S13 Table — (XLSX) [file pgen.1006719.s024.xlsx]

## Sheet: S13 Table
S13 Table. Fine mapping of novel loci and previously identified loci with locus-wide significance in African ancestry individuals using 1000 Genomes imputed results from African, European and combined ancestries.
									African Ancestry 1000 Genomes											European 1000 Genomes										African Americans and Europeans 1000 Genomes
									AAAGC lead SNP							99% credible set				GIANT lead SNP						99% credible set				AAAGC+GIANT lead SNP						99% credible set
Trait	LocusID	Loci	EA or AA loci	Lead SNPs	Chr	Position	Flanking region*		Lead SNP	Position	Effect/Other alleles	EAF	Effect (SE)	P	Posterior Probability	SNPs (N)	Interval (bp)	Interval start (bp)	Interval stop (bp)	Lead SNP	Position	Effect/Other alleles	Zscore	P	Posterior Probability	SNPs (N)	Interval (bp)	Interval start (bp)	Interval stop (bp)	Lead SNP	Position	Effect/Other alleles	Zscore	P	Posterior Probability	SNPs (N)	Interval (bp)	Interval start (bp)	Interval stop (bp)
BMI	3	COL16A1	European sex-combined	rs2271928	1	32127953	32036927	32240262	rs11434274	32078072	I/D	0.92	0.061 (0.016)	0.0001563	0.23026	909	203335	32036927	32240262	rs4568876	32152518	T/C	4.39024	1.13226e-05	0.0883658	107	175859	32052145	32228004	rs4949459	32142354	T/G	4.681	2.85e-06	0.0896528	96	139553	32054094	32193647
BMI	4	MAST2	European sex-combined	rs2275426	1	46487552	45766451	46801601	rs55958907	45968625	C/T	0.9737	0.106 (0.027)	7.627e-05	0.125329	4218	1035150	45766451	46801601	rs2275426	46487552	A/G	4.6875	2.76563e-06	0.157992	705	665594	45976147	46641741	rs12760175	46447840	C/G	4.433	9.28e-06	0.121761	4015	1035020	45766451	46801471
BMI	11	PTBP2	European sex-combined	rs11165643	1	96924097	96672220	97299890	rs201883099	96989049	D/I	0.4385	0.031 (0.007)	4.128e-05	0.0577469	2956	627670	96672220	97299890	rs11165643	96924097	T/C	7.03226	2.03215e-12	0.702795	52	82453	96882671	96965124	rs11165643	96924097	T/C	7.56	4.026e-14	0.701468	24	120193	96882671	97002864
BMI	15	SEC16B	European sex-combined	rs543874	1	177889480	177786475	177937441	rs543874	177889480	G/A	0.2484	0.055 (0.008)	5.753e-11	0.425462	5	7573	177887018	177894591	rs543874	177889480	G/A	12.359	4.35541e-35	0.95585	3	13966	177875514	177889480	rs543874	177889480	G/A	13.854	1.202e-43	1	1	0	177889480	177889480
BMI	16	FAM5C	European sex-combined	rs10920678	1	190239907	189968293	190607833	rs75421739	190290150	T/A	0.8268	0.038 (0.01)	6.437e-05	0.0527648	3430	639394	189968439	190607833	rs10920678	190239907	A/G	4.74194	2.11681e-06	0.349899	400	627788	189972588	190600376	rs10920678	190239907	A/G	4.911	9.065e-07	0.172647	407	171603253	18997123	190600376
BMI	17	NAV1	European sex-combined	rs2820292	1	201784287	201719335	201923383	rs71564168	201885644	D/I	0.5742	0.029 (0.008)	0.0001277	0.273574	1070	203766	201719617	201923383	rs2820292	201784287	C/A	6.29032	3.16812e-10	0.464883	43	101475	201783682	201885157	rs2820292	201784287	C/A	6.655	2.842e-11	0.645099	38	100870	201784287	201885157
BMI	18	TMEM18	European sex-combined	rs13021737	2	632348	596629	715659	rs7579427	631183	A/C	0.8712	0.065 (0.011)	2.44e-09	0.0890556	111	39228	613044	652272	rs13021737	632348	G/A	15.025	5.03613e-51	0.335282	18	30046	621461	651507	rs13021737	632348	G/A	16.003	1.211e-57	0.596426	8	14260	621461	635721
BMI	19	ADCY3	European sex-combined	rs10182181	2	25150296	24692809	25485735	rs10203482	25136916	C/T	0.8137	0.046 (0.01)	1.821e-06	0.125035	494	787052	24696795	25483847	rs10182181	25150296	G/A	9.90323	4.03043e-23	0.819276	3	8758	25141538	25150296	rs10182181	25150296	G/A	10.823	2.692e-27	0.722981	3	8758	25141538	25150296
BMI	35	LOC646736	European men	rs2176040	2	227092802	226897519	227199897	rs2894586	227028733	T/A	0.6557	0.048 (0.012)	6.514e-05	0.153655	1595	302378	226897519	227199897	rs2176040	227092802	A/G	5.69048	1.26686e-08	0.0589905	87	161030	227020653	227181683	rs2176040	227092802	A/G	6.406	1.499e-10	0.10742	48	119226	227026531	227145757
BMI	36	NUP210	European sex-combined	rs9845966	3	13433158	13286504	13527134	rs57635268	13347705	C/T	0.2308	0.034 (0.009)	9.235e-05	0.164171	1569	240630	13286504	13527134	rs9845966	13433158	T/G	3.375	0.000738157	0.026874	757	240411	13286723	13527134	rs354472	13340809	T/C	4.083	4.446e-05	0.0610984	17692	240630	13286504	13527134
BMI	41	ROBO1	European sex-combined	rs1840969	3	78830840	78670654	79023416	rs113512329	78979863	T/C	0.9892	0.174 (0.043)	5.858e-05	0.128365	1783	352652	78670654	79023306	rs11924366	78914742	T/C	3.97631	6.99929e-05	0.057206	384	343224	78670654	79013878	rs11127636	78922852	C/A	4.606	4.1e-06	0.210551	914	352652	78670654	79023306
BMI	43	CADM2	European sex-combined	rs13078960	3	85807590	85395341	86268310	rs141148264	85574514	T/A	0.0151	0.145 (0.034)	2.356e-05	0.163482	5620	872969	85395341	86268310	rs13078960	85807590	G/T	7.61538	2.62917e-14	0.151086	27	91566	85807590	85899156	rs2122042	85866335	T/G	7.75	9.182e-15	0.195658	25	91566	85807590	85899156
BMI	47	ETV5	European sex-combined	rs1516725	3	185824004	185720160	185841624	rs7647305	185834290	C/T	0.5949	0.039 (0.008)	6.933e-07	0.497723	58	111668	185729753	185841421	rs1516725	185824004	C/T	9.80435	1.07839e-22	0.432219	20	36474	185798025	185834499	rs1516725	185824004	C/T	10.567	4.223e-26	0.253921	16	36474	185798025	185834499
BMI	49	GNPDA2	European sex-combined	rs10938397	4	45182527	45012567	45274282	rs10938397	45182527	G/A	0.2435	0.053 (0.008)	3.76e-10	0.216866	10	20489	45165650	45186139	rs10938397	45182527	G/A	12.9677	1.86544e-38	0.513941	3	6836	45175691	45182527	rs10938397	45182527	G/A	14.329	1.437e-46	0.588805	3	6836	45175691	45182527
BMI	53	HHIP	European sex-combined	rs11727676	4	145659064	145433575	146177041	rs149899782	145631568	A/G	0.0088	0.197 (0.052)	0.0001467	0.124751	3172	743466	145433575	146177041	rs11727676	145659064	T/C	5.59375	2.22217e-08	0.97263	2	37736	145621328	145659064	rs11727676	145659064	T/C	5.363	8.17e-08	0.945282	8	229858	145511040	145740898
BMI	novel	IRX4/IRX2	African American women	rs112778462	5	2177693	2144662	2242132	rs112778462	2177693	A/G	0.0232	0.159 (0.035)	6.055e-06	0.43247	378	96976	2144662	2241638	rs139288035	2239824	C/T	2.08933	0.0366778	0.012505	487	97470	2144662	2242132	rs112778462	2177693	A/G	4.524	6.055e-06	0.427911	412	96795	2144843	2241638
BMI	57	PCSK1	European sex-combined	rs7713317	5	95716722	95210491	95782290	rs201958019	95402369	I/D	0.8202	0.046 (0.012)	6.856e-05	0.14409	3035	571799	95210491	95782290	rs7713317	95716722	G/A	5.02941	4.91991e-07	0.237929	48	291488	95470989	95762477	rs144489757	95694609	G/C	5.289	1.232e-07	0.244129	45	253754	95497795	95751549
BMI	61	GALNT10	European sex-combined	rs7715256	5	153537893	153356566	153734278	rs7708584	153543466	A/G	0.3066	0.059 (0.008)	1.047e-13	0.3313	6	8181	153540025	153548206	rs815611	153518766	G/A	5.37838	7.51591e-08	0.148231	62	68910	153495768	153564678	rs1366219	153545698	A/T	7.623	2.48e-14	0.29549	10	29440	153518766	153548206
BMI	66	TFAP2B	European sex-combined	rs2207139	6	50845490	50421623	51143101	rs72887147	50914348	T/C	0.0968	0.059 (0.013)	2.403e-06	0.0739829	388	703759	50423410	51127169	rs2207139	50845490	G/A	11.175	5.40504e-29	0.278102	7	112565	50798526	50911091	rs4715213	50911091	T/C	12.055	1.834e-33	0.373419	6	112565	50798526	50911091
BMI	69	IFNGR1	European sex-combined	rs13201877	6	137675541	137613270	137681000	rs9399210	137616464	C/A	0.3769	0.027 (0.008)	0.0004296	0.137035	421	67665	137613335	137681000	rs13201877	137675541	G/A	5.17778	2.24542e-07	0.781631	62	60995	137614546	137675541	rs13201877	137675541	G/A	5.485	4.123e-08	0.675822	61	60995	137614546	137675541
BMI	72	ZNF12	European sex-combined	rs1830074	7	6718674	6550494	6851834	rs61677617	6642710	A/G	0.0588	0.072 (0.017)	3.654e-05	0.246751	1521	282351	6550494	6832845	rs1830074	6718674	C/T	4.40476	1.05901e-05	0.152591	348	233173	6552203	6785376	rs1830074	6718674	C/T	4.18	2.92e-05	0.0457794	23402	301340	6550494	6851834
BMI	novel	INTS10/LPL	African American men	rs149352150	8	19736154	19702001	19829703	rs149352150	19736154	G/A	0.0126	0.341 (0.058)	4.288e-09	0.475002	15	59541	19729657	19789198	rs6998248	19712564	T/C	2.13953	0.0323924	0.0168587	475	126971	19702001	19828972	rs149352150	19736154	G/A	5.873	4.288e-09	0.474889	15	59541	19729657	19789198
BMI	82	Intergenic	European sex-combined	rs10954968	8	34488074	33981690	34687499	rs6999372	34472690	T/C	0.7077	0.033 (0.008)	4.013e-05	0.0399706	3958	705809	33981690	34687499	rs7844647	34503776	T/C	4.51429	6.35292e-06	0.0595262	670	687758	33993184	34680942	rs7844647	34503776	T/C	4.895	9.83e-07	0.0837788	554	687758	33993184	34680942
BMI	89	LINGO2	European sex-combined	rs10968576	9	28414339	28386295	28516764	rs17770336	28414625	T/C	0.182	0.04 (0.009)	1.921e-05	0.169996	581	130348	28386295	28516643	rs10968576	28414339	G/A	7.54545	4.50728e-14	0.350032	12	7608	28410903	28418511	rs10968576	28414339	G/A	8.446	3.022e-17	0.647053	11	7608	28410903	28418511
BMI	91	TLR4	European sex-combined	rs1928295	9	120378483	120240163	120517980	rs12348421	120410319	T/G	0.1848	0.038 (0.01)	8.022e-05	0.166308	1478	277817	120240163	120517980	rs1928295	120378483	T/C	6.06452	1.32348e-09	0.994903	1	0	120378483	120378483	rs1928295	120378483	T/C	5.438	5.379e-08	0.980207	12	65793	120340216	120406009
BMI	95	GRID1	European sex-combined	rs7899106	10	87410904	87286630	87676237	rs34174812	87383579	G/T	0.192	0.036 (0.009)	7.831e-05	0.103207	2394	389607	87286630	87676237	rs7899106	87410904	G/A	5.56338	2.64599e-08	0.292313	164	290620	87348244	87638864	rs7899106	87410904	G/A	6.386	1.702e-10	0.678952	8	2232	87408672	87410904
BMI	98	TCF7L2	European sex-combined	rs7903146	10	114758349	114711983	114830254	rs12098651	114761719	G/A	0.8031	0.035 (0.01)	0.0002416	0.0770956	520	118271	114711983	114830254	rs7903146	114758349	C/T	6.88235	5.88731e-12	0.818774	9	54831	114754071	114808902	rs7903146	114758349	C/T	7.621	2.525e-14	0.876807	4	13700	114754071	114767771
BMI	102	BDNF	European sex-combined	rs11030104	11	27684517	27350390	27776622	rs10501087	27670108	T/C	0.9309	0.072 (0.015)	6.835e-07	0.0963133	58	156346	27587149	27743495	rs11030104	27684517	A/G	10.8947	1.22169e-27	0.302486	15	91654	27636885	27728539	rs10501087	27670108	T/C	11.788	4.501e-32	0.357533	12	61555	27666984	27728539
BMI	104	MTCH2	European sex-combined	rs3817334	11	47650993	46683957	48352204	rs141088618	47350415	G/T	0.9908	0.244 (0.059)	3.56e-05	0.150244	8024	1668074	46683957	48352031	rs3817334	47650993	T/C	8.45161	2.87313e-17	0.682037	3	121046	47529947	47650993	rs3817334	47650993	T/C	8.222	1.999e-16	0.572118	3	121046	47529947	47650993
BMI	123	STXBP6	European sex-combined	rs10132280	14	25928179	25918787	26076248	rs35956589	25924078	G/A	0.5179	0.033 (0.009)	0.0001166	0.212495	967	157461	25918787	26076248	rs10132280	25928179	C/A	6.76471	1.33576e-11	0.999727	1	0	25928179	25928179	rs10132280	25928179	C/A	6.71	1.949e-11	0.996431	1	0	25928179	25928179
BMI	124	PRKD1	European sex-combined	rs12885454	14	29736838	29563124	29899685	rs974471	29685328	A/G	0.7014	0.032 (0.008)	0.0001001	0.21398	1582	336561	29563124	29899685	rs12885454	29736838	C/A	6.27273	3.54772e-10	0.962918	18	27318	29719646	29746964	rs12885454	29736838	C/A	5.985	2.161e-09	0.525892	20	82450	29677727	29760177
BMI	127	NRXN3	European sex-combined	rs7141420	14	79899454	79680278	80076536	rs17109214	79905862	G/T	0.036	0.083 (0.02)	3.215e-05	0.10445	1883	396258	79680278	80076536	rs7144011	79940383	T/G	7.60526	2.84332e-14	0.490935	3	40929	79899454	79940383	rs7144011	79940383	T/G	7.844	4.37e-15	0.44001	3	40929	79899454	79940383
BMI	128	BTBD7	European sex-combined	rs3783890	14	93790276	93651992	94192004	rs77048189	94087548	G/A	0.0237	0.11 (0.026)	3.363e-05	0.113772	2346	540012	93651992	94192004	rs3783890	93790276	T/C	4.97436	6.54636e-07	0.902564	199	485357	93702475	94187832	rs3783890	93790276	T/C	5.634	1.757e-08	0.946583	38	372155	93715393	94087548
BMI	132	MAP2K5	European sex-combined	rs16951275	15	68077168	67675547	68285454	rs61101319	68053581	I/D	0.7391	0.036 (0.008)	1.746e-05	0.127074	2449	609907	67675547	68285454	rs16951275	68077168	T/C	8.40541	4.26369e-17	0.275609	10	54422	68060552	68114974	rs16951275	68077168	T/C	9.099	9.144e-20	0.24055	10	54422	68060552	68114974
BMI	137	NLRC3	European sex-combined	rs758747	16	3627358	3392053	3750975	rs1878931	3450907	G/C	0.3903	0.034 (0.008)	5.795e-06	0.130566	1017	358695	3392053	3750748	rs758747	3627358	T/C	6.08108	1.19376e-09	0.578212	2	27703	3599655	3627358	rs12448257	3599655	A/G	6.596	4.233e-11	0.95571	4	54664	3572694	3627358
BMI	140	ATP2A1	European sex-combined	rs3888190	16	28889486	28290927	29025978	rs62036598	28757961	A/G	0.0283	0.168 (0.038)	8.456e-06	0.217278	987	734739	28291239	29025978	rs3888190	28889486	A/C	9.96774	2.10975e-23	0.215198	12	57615	28837515	28895130	rs3888190	28889486	A/C	10.427	1.86e-25	0.289648	10	53353	28841777	28895130
BMI	141	INO80E	European sex-combined	rs4787491	16	30015337	29910725	30500716	rs61764202	30134679	C/T	0.6849	0.037 (0.009)	6.329e-05	0.127022	1297	589756	29910725	30500481	rs4787491	30015337	G/A	4.67647	2.91855e-06	0.0271371	131	192348	29924905	30117253	rs4787491	30015337	G/A	5.593	2.238e-08	0.135277	124	182201	29935052	30117253
BMI	143	CBLN1	European sex-combined	rs2080454	16	49062590	49005933	49200064	rs2355902	49109148	T/A	0.2112	0.033 (0.009)	0.0001765	0.0733839	1170	193805	49006259	49200064	rs2080454	49062590	C/A	5.41935	5.98161e-08	0.284191	27	53042	49039077	49092119	rs2080454	49062590	C/A	5.642	1.677e-08	0.327197	24	53042	49039077	49092119
BMI	144	FTO	European sex-combined	rs1558902	16	53803574	53773104	53848561	rs17817964	53828066	T/C	0.1165	0.067 (0.011)	5.481e-09	0.213658	26	44533	53800954	53845487	rs1421085	53800954	C/T	26.2258	1.34996e-151	0.999998	1	0	53800954	53800954	rs1421085	53800954	C/T	26.5	9.7e-155	1	1	0	53800954	53800954
BMI	149	GGNBP2	European sex-combined	rs12150665	17	34914787	34481492	34988444	rs181169502	34874391	G/A	0.2125	0.047 (0.011)	3.579e-05	0.733714	761	504401	34484043	34988444	rs12150665	34914787	T/C	5.19355	2.06321e-07	0.17876	77	125525	34835526	34961051	rs9906189	34905408	G/A	5.126	2.958e-07	0.213533	77	125525	34835526	34961051
BMI	156	LOC284260	European women	rs7239883	18	40147671	39892281	40196798	rs34956214	39998578	I/D	0.8013	0.044 (0.012)	0.0001276	0.0555447	2155	304517	39892281	40196798	rs7239883	40147671	G/A	5.63415	1.75928e-08	0.961072	14	100936	40075856	40176792	rs7239883	40147671	G/A	5.269	1.373e-07	0.936111	100	278508	39910592	40189100
BMI	158	GRP	European sex-combined	rs7243357	18	56883319	56868042	56942671	rs4245280	56902134	C/T	0.336	0.035 (0.009)	7.036e-05	0.387656	584	74089	56868042	56942131	rs7243357	56883319	T/G	5.425	5.79545e-08	0.872082	18	7091	56876228	56883319	rs7243357	56883319	T/G	5.622	1.889e-08	0.85276	12	7091	56876228	56883319
BMI	159	MC4R	European sex-combined	rs6567160	18	57829135	57727250	57940764	rs6567160	57829135	C/T	0.1969	0.062 (0.009)	2.742e-11	0.489629	17	111965	57802714	57914679	rs663129	57838401	A/G	15.4722	5.34487e-54	0.523795	5	23452	57829135	57852587	rs6567160	57829135	C/T	16.791	2.834e-63	1	1	0	57829135	57829135
BMI	161	CCNE1	European sex-combined	rs17513613	19	30286822	30199851	30376718	rs57018253	30239543	G/A	0.2786	0.038 (0.01)	0.0001989	0.146551	1294	176867	30199851	30376718	rs17513613	30286822	C/T	4.54545	5.4818e-06	0.14175	67	131833	30242739	30374572	rs17513613	30286822	C/T	4.417	1.002e-05	0.148074	583	176066	30200521	30376587
BMI	163	KCTD15	European sex-combined	rs29941	19	34309532	34265878	34354026	rs150969002	34332406	C/T	0.9786	0.102 (0.027)	0.0001119	0.229576	540	88148	34265878	34354026	rs29938	34311481	C/T	5.51515	3.48483e-08	0.137009	45	33995	34299851	34333846	rs256336	34315518	T/C	5.568	2.58e-08	0.136389	35	42506	34290995	34333501
BMI	167	MACROD2	European sex-combined	rs175804	20	15832299	15802809	15914464	rs16996644	15813475	G/C	0.1536	0.038 (0.01)	0.0001781	0.263433	798	111655	15802809	15914464	rs8123881	15819495	G/A	5.06667	4.04835e-07	0.959337	7	24549	15813475	15838024	rs8123881	15819495	G/A	5.664	1.48e-08	0.949555	6	24549	15813475	15838024
BMI	novel	MLC1	African American men	rs56330886	22	50493427	50468819	50658501	rs56330886	50493427	G/T	0.1893	0.096(0.016)	4.811e-09	0.999436	1	0	50493427	50493427	rs6537639	50633686	C/T	2.47059	0.0134891	0.0166266	903	189682	50468819	50658501	rs56330886	50493427	G/T	5.854	4.811e-09	0.784841	12	26705	50493427	50520132
WHRadjBMI	novel	SSX2IP	African American women	rs140858719	1	85203061	85084120	85230140	rs140858719	85203061	G/A	0.9942	0.506 (0.093)	5.073e-08	0.835435	17	96500	85106561	85203061	rs2943673	85105544	C/T	2.15182	0.0314119	0.0168039	381	145952	85084120	85230072	rs140858719	85203061	G/A	5.449	5.073e-08	0.838305	16	96500	85106561	85203061
WHRadjBMI	2	TBX15-WARS2	European sex-combined	rs2645294	1	119574587	119307886	119799665	rs10923754	119668640	C/T	0.3721	0.041 (0.01)	6.9e-05	0.0299777	2528	491629	119308036	119799665	rs10923724	119546842	T/C	8.85714	8.20912e-19	0.286297	5	70303	119504284	119574587	rs984225	119504284	A/G	9.419	4.575e-21	0.634269	5	70303	119504284	119574587
WHRadjBMI	3	DCST2	European women	rs905938	1	154991389	154821134	155098004	rs12096640	154958067	C/T	0.6501	0.049 (0.012)	4.432e-05	0.281562	1527	276870	154821134	155098004	rs905938	154991389	T/C	6.2963	3.04842e-10	0.987736	2	7026	154984363	154991389	rs905938	154991389	T/C	6.267	3.688e-10	0.967948	3	7026	154984363	154991389
WHRadjBMI	4	GORAB	European women	rs10919388	1	170372503	170196342	170549087	rs77162616	170333250	I/D	0.805	0.063 (0.016)	5.117e-05	0.126348	2739	352564	170196523	170549087	rs10919388	170372503	C/A	6.34615	2.20764e-10	0.498066	18	48954	170330773	170379727	rs10919388	170372503	C/A	7.026	2.12e-12	0.515301	21	58976	170320751	170379727
WHRadjBMI	9	ETAA1	European sex-combined	rs2860517	2	67749674	67606326	67870705	rs18122	67654434	G/A	0.1747	0.061 (0.013)	4.583e-06	0.1176	338	262910	67607091	67870001	rs7598674	67852689	G/A	5.14286	2.70592e-07	0.264057	155	262395	67606326	67868721	rs7598832	67853013	C/T	5.54	3.03e-08	0.374544	67	257248	67611250	67868498
WHRadjBMI	10	GRB14-COBLL1	European women	rs10195252	2	165513091	165449620	165742244	rs10187501	165532454	A/G	0.3832	0.05 (0.012)	3.442e-05	0.0923712	1934	292624	165449620	165742244	rs10184004	165508389	C/T	11.3043	1.24878e-29	0.244528	5	31272	165508389	165539661	rs1128249	165528624	G/T	11.987	4.144e-33	0.406608	5	31272	165508389	165539661
WHRadjBMI	12	PPARG	European women	rs17819328	3	12489342	12397838	12787986	rs9868779	12483814	A/G	0.7665	0.058 (0.014)	2.752e-05	0.171631	3171	390148	12397838	12787986	rs17819328	12489342	G/T	7.44681	9.56249e-14	0.997783	1	0	12489342	12489342	rs17819328	12489342	G/T	7.61	2.75e-14	0.99775	1	0	12489342	12489342
WHRadjBMI	14	ADAMTS9	European women	rs2371767	3	64718258	64662364	64858467	rs66815886	64703394	G/T	0.4565	0.079 (0.012)	7.985e-12	0.995682	1	0	64703394	64703394	rs66815886	64703394	G/T	10.7514	5.83543e-27	0.419883	11	17833	64700425	64718258	rs66815886	64703394	G/T	12.553	3.842e-36	0.995259	1	0	64703394	64703394
WHRadjBMI	15	PLXND1	European women	rs10804591	3	129334233	129126975	129699722	rs11915828	129604032	G/C	0.0948	0.084 (0.02)	3.63e-05	0.140331	3773	572747	129126975	129699722	rs10804591	129334233	A/C	7.14286	9.14107e-13	0.151219	31	35268	129307191	129342459	rs9840468	129328711	A/G	7.71	1.258e-14	0.408086	9	25572	129315831	129341403
WHRadjBMI	18	FAM13A	European women	rs9991328	4	89713121	89612444	89840165	rs2869948	89721332	C/T	0.5315	0.057 (0.012)	1.474e-06	0.267099	80	226926	89612668	89839594	rs9991328	89713121	T/C	6.22222	4.90163e-10	0.651715	14	34626	89706643	89741269	rs2276936	89726283	C/A	7.187	6.621e-13	0.518885	11	28148	89713121	89741269
WHRadjBMI	20	HHIP	European sex-combined	rs11947381	4	145537850	145323217	146177041	rs139516594	145355011	A/G	0.0036	0.65 (0.145)	7.526e-06	0.660774	4529	853824	145323217	146177041	rs789351	145868370	T/C	5.14286	2.70592e-07	0.281495	86	490128	145517578	146007706	rs13146972	145569692	C/T	4.889	1.015e-06	0.191572	506	842134	145334907	146177041
WHRadjBMI	29	RSPO3	European sex-combined	rs1936805	6	127452116	127096527	127542953	rs2745358	127391470	A/G	0.4897	0.044 (0.011)	2.687e-05	0.360282	2387	446426	127096527	127542953	rs1936805	127452116	T/C	12.3529	4.69627e-35	0.198754	5	6889	127448249	127455138	rs7766106	127455138	T/C	12.748	3.197e-37	0.765986	5	6889	127448249	127455138
WHRadjBMI	33	SNX10	European women	rs1534696	7	26397239	26308643	26483369	rs1534696	26397239	C/A	0.3919	0.047 (0.012)	8.079e-05	0.112121	1374	174726	26308643	26483369	rs1534696	26397239	C/A	5.5102	3.58418e-08	0.98503	2	27049	26370190	26397239	rs1534696	26397239	C/A	6.541	6.106e-11	0.999853	1	0	26397239	26397239
WHRadjBMI	novel	CASC8	African American women	rs378854	8	128323819	128269154	128399697	rs378854	128323819	C/T	0.7871	0.062 (0.015)	3.336e-05	0.390921	1229	130543	128269154	128399697	rs35049703	128342114	C/A	5.20022	1.99054e-07	0.504921	94	116276	128273489	128389765	rs1395287	128338702	C/G	6.006	1.907e-09	0.388973	10	27284	128315582	128342866
WHRadjBMI	40	PTPDC1	All ancestry sex combined	rs2398893	9	96758342	96677307	96977650	rs138610976	96765872	A/G	0.9849	0.251 (0.061)	4.081e-05	0.218463	1736	300343	96677307	96977650	rs2398893	96758342	A/G	4.86486	1.14535e-06	0.419911	47	189744	96704522	96894266	rs2398893	96758342	A/G	5.008	5.486e-07	0.704878	170	293968	96679779	96973747
WHRadjBMI	novel	TCF7L2/HABP2	African American sex-combined	rs116718588	10	115189239	115118898	115326103	rs116718588	115189239	A/G	0.9548	0.114 (0.025)	5.877e-06	0.606714	1174	207110	115118898	115326008	rs2000277	115310514	C/T	2.91667	0.00353793	0.0380725	635	207205	115118898	115326103	rs116718588	115189239	A/G	4.531	5.877e-06	0.598413	1352	207205	115118898	115326103
WHRadjBMI	novel	PDE3B	African American women	rs185693786	11	14804296	14248498	15127148	rs185693786	14804296	A/T	0.9648	0.174 (0.033)	1.408e-07	0.0769408	90	630272	14299328	14929600	rs2303975	14276999	G/A	3.33333	0.000858122	0.0956464	1179	878477	14248671	15127148	rs149949205	14711048	A/T	5.264	1.408e-07	0.0777623	84	630272	14299328	14929600
WHRadjBMI	46	CNTN5	European women	rs1394461	11	99222349	99086508	99295750	rs185738941	99251995	G/A	0.9961	0.527 (0.142)	0.0002009	0.104523	2094	209242	99086508	99295750	rs1394461	99222349	C/G	3.90209	9.53677e-05	0.275528	741	209236	99086508	99295744	rs11600078	99223326	G/T	3.818	0.0001348	0.0820802	2012	209242	99086508	99295750
WHRadjBMI	47	ITPR2-SSPN	European sex-combined	rs10842707	12	26471364	26437449	26533371	rs149617655	26463728	G/C	0.0042	0.602 (0.164)	0.000254	0.182299	740	95868	26437503	26533371	rs1463679	26470169	T/G	8.20513	2.30345e-16	0.179502	22	45152	26443030	26488182	rs11048456	26463082	C/T	8.395	4.648e-17	0.356017	12	28393	26463082	26491475
WHRadjBMI	48	HOXC4-HOXC5-HOXC6	European sex combined; secondary signal	rs2071449	12	54428011	54383500	54476772	rs115789957	54412565	C/T	0.9546	0.112 (0.029)	0.0001177	0.28722	446	93272	54383500	54476772	rs2071449	54428011	A/C	7.77778	7.38094e-15	0.804431	14	15486	54417525	54433011	rs2071449	54428011	A/C	7.814	5.53e-15	0.734921	11	11860	54417525	54429385
WHRadjBMI	novel	SPRYD7/DLEU2	African American sex-combined	rs2472591	13	50536360	50387761	50753247	rs2472591	50536360	T/A	0.2064	0.05 (0.013)	9.715e-05	0.130638	1854	365486	50387761	50753247	rs7986337	50483928	G/A	4.50704	6.57376e-06	0.145699	169	365486	50387761	50753247	rs2472591	50536360	T/A	5.408	6.371e-08	0.289059	30	248585	50483928	50732513
WHRadjBMI	52	KLF13	European sex-combined	rs8042543	15	31708263	31616674	31779838	rs75356640	31697284	A/G	0.9638	0.139 (0.035)	6.548e-05	0.470031	1197	162732	31616674	31779406	rs8042543	31708263	C/T	6.04651	1.48015e-09	0.984735	2	56467	31651796	31708263	rs8042543	31708263	C/T	6.253	4.021e-10	0.992886	1	0	31708263	31708263
WHRadjBMI	54	SMAD6	European sex-combined	rs1440372	15	67033151	66973767	67046450	rs6494594	66979812	C/G	0.4657	0.046 (0.011)	4.098e-05	0.461923	492	72683	66973767	67046450	rs1440372	67033151	C/T	6.31579	2.68787e-10	0.831157	2	6934	67026217	67033151	rs2053423	67026217	T/C	6.476	9.388e-11	0.746716	3	33323	66999828	67033151
WHRadjBMI	55	NEO1	European sex-combined	rs11072405	15	73485160	73170431	73691846	rs189143180	73382158	G/A	0.0119	0.236 (0.055)	1.579e-05	0.173245	2975	521415	73170431	73691846	rs2415142	73431600	G/T	4.04148	5.31156e-05	0.0680824	709	515244	73174147	73689391	rs2415142	73431600	G/T	4.546	5.473e-06	0.117801	1605	520518	73170791	73691309
WHRadjBMI	novel	ZDHHC1/HSD11B2	African American women	rs6499129	16	67458251	66881866	68351859	rs6499129	67458251	I/D	0.5981	0.055 (0.012)	9.058e-06	0.195707	6612	1469993	66881866	68351859	rs4380048	67538193	T/C	4.69231	2.7014e-06	0.0532885	414	1067595	67226405	68294000	rs9933102	67538910	T/C	5.544	2.959e-08	0.112879	129	346854	67308279	67655133
WHRadjBMI	56	CMIP	European women	rs2925979	16	81534790	81472234	81553608	rs2925979	81534790	C/T	0.6895	0.057 (0.013)	1.095e-05	0.453714	622	81374	81472234	81553608	rs2925979	81534790	T/C	6.53061	6.55015e-11	0.996628	1	0	81534790	81534790	rs2925979	81534790	T/C	7.647	2.059e-14	0.999653	1	0	81534790	81534790
WHRadjBMI	57	PEMT	European sex-combined	rs4646404	17	17420199	17361174	17607317	rs147906381	17471374	I/D	0.2522	0.05 (0.012)	2.155e-05	0.0809242	917	245844	17361336	17607180	rs4646404	17420199	G/A	6.92308	4.41937e-12	0.998666	1	0	17420199	17420199	rs4646404	17420199	G/A	7.037	1.964e-12	0.99954	1	0	17420199	17420199

## Sheet: Sheet1
5	2177693
8	19736154
22	50493427
1	85203061
8	128323819
11	14804296
16	67458251
